# Supplementary material for: Mesenchymal stem cell-derived exosomes have altered microRNA profiles and induce osteogenic differentiation depending on the stage of differentiation
Source: PubMed Central journal article supplement (PMC5814093; doi:10.1371/journal.pone.0193059), 2018-02-15
Supplement: pone.0193059.s001.pdf [file pone.0193059.s001.pdf]

Supplementary data

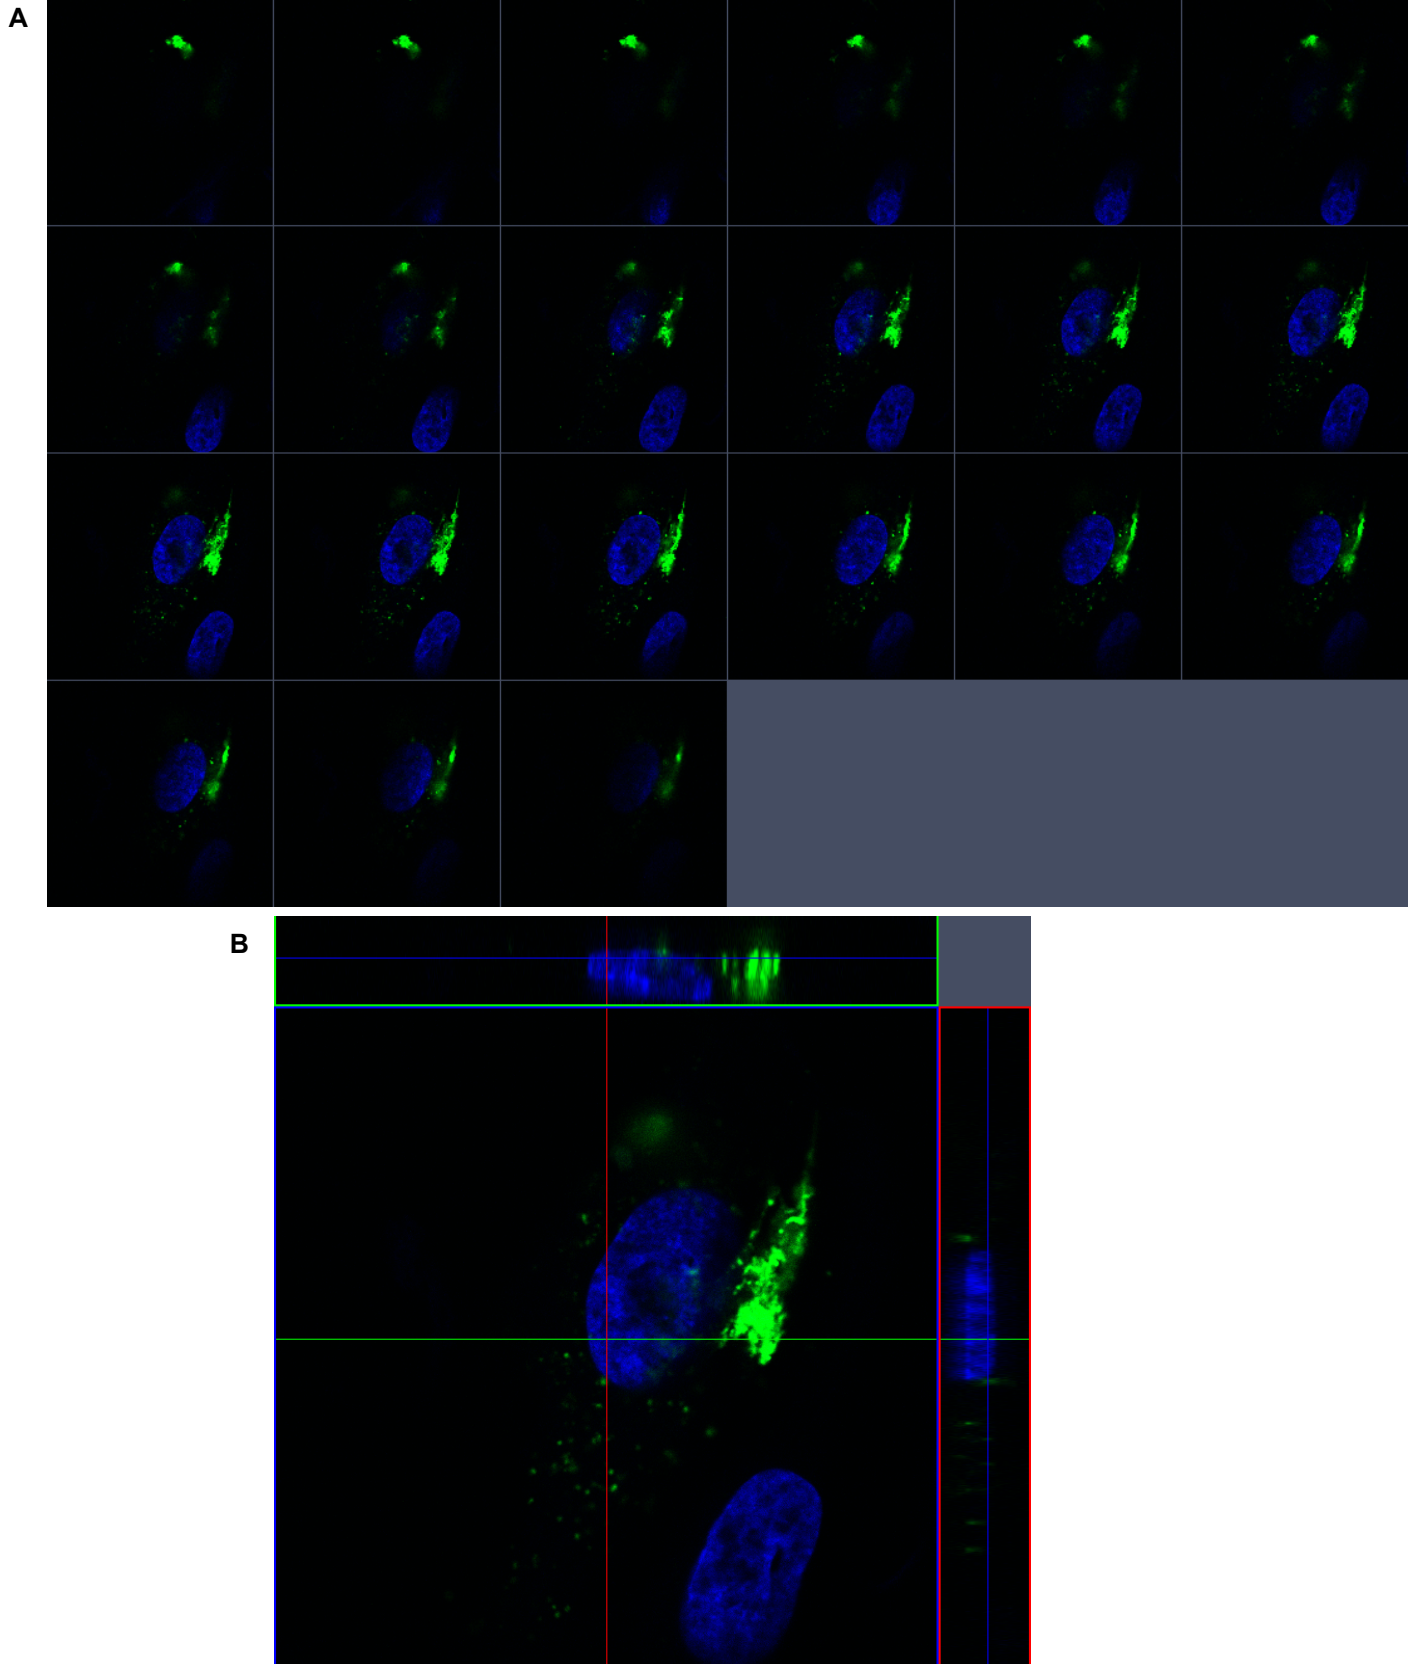

S1 Fig. Internalisation of PKH67-labelled exosomes in hMSCs.  
The Z-stack gallery (A) and orthographic view (B) show the intracellular localization of PKH67-labelled exosomes.
