# Supplementary material for: Mesenchymal stem cell-derived exosomes have altered microRNA profiles and induce osteogenic differentiation depending on the stage of differentiation
Source: PubMed Central journal article supplement (PMC5814093; doi:10.1371/journal.pone.0193059), 2018-02-15
Supplement: pone.0193059.s004.pdf [file pone.0193059.s004.pdf]

## Supplementary data

S1 Table. microRNA expression in MSCs and exosomes during expansion (P6), early (D3) and late (D21) osteogenic differentiation. B1, B2 and B3 indicate 3 biological repeats. The total number of samples that present each individual microRNA is summarised in the column “Count”. ND denotes not detected and BF denotes background filtered.

|                 | MSC_P6_B1 | MSC_P6_B2 | MSC_P6_B3 | MSC_D3_B1 | MSC_D3_B2 | MSC_D3_B3 | MSC_D21_B1 | MSC_D21_B2 | MSC_D21_B3 | exo_P6_B1 | exo_P6_B2 | exo_P6_B3 | exo_D3_B1 | exo_D3_B2 | exo_D3_B3 | exo_D21_B1 | exo_D21_B2 | exo_D21_B3 | Count | Standard deviation |
|-----------------|-----------|-----------|-----------|-----------|-----------|-----------|------------|------------|------------|-----------|-----------|-----------|-----------|-----------|-----------|------------|------------|------------|-------|--------------------|
| hsa-miR-34a-5p  | 25.3      | 25.6      | 25.5      | 26.3      | 25.9      | 26.2      | 26.6       | 26.5       | 27.3       | 32.8      | 33.5      | 31.0      | 31.6      | 30.9      | 29.9      | 34.0       | 36.9       | 32.2       | 18.0  | 3.6                |
| hsa-miR-22-3p   | 27.2      | 27.4      | 27.0      | 27.0      | 26.8      | 26.8      | 26.5       | 26.9       | 28.0       | 34.2      | 33.6      | 32.1      | 33.2      | 31.9      | 29.9      | 34.3       | 34.9       | 31.4       | 18.0  | 3.2                |
| hsa-miR-365a-3p | 28.3      | 28.7      | 29.0      | 29.0      | 28.3      | 27.9      | 28.5       | 28.7       | 29.3       | 36.2      | 34.7      | 32.9      | 35.5      | 33.8      | 31.7      | 35.7       | 35.2       | 33.5       | 18.0  | 3.1                |
| hsa-let-7i-5p   | 25.0      | 25.0      | 25.2      | 25.7      | 25.6      | 25.7      | 25.6       | 25.5       | 26.3       | 31.3      | 32.1      | 30.0      | 31.6      | 29.9      | 29.0      | 32.5       | 33.2       | 30.2       | 18.0  | 3.0                |
| hsa-miR-29c-3p  | 27.0      | 27.5      | 27.2      | 28.6      | 28.1      | 27.4      | 28.9       | 29.0       | 30.5       | 33.8      | 33.6      | 31.9      | 33.2      | 31.7      | 30.5      | 35.0       | 36.5       | 32.5       | 18.0  | 2.9                |
| hsa-let-7b-5p   | 25.6      | 25.8      | 24.8      | 25.0      | 25.4      | 25.7      | 24.5       | 24.7       | 25.3       | 30.7      | 31.9      | 29.7      | 31.9      | 28.9      | 28.2      | 31.8       | 32.3       | 28.8       | 18.0  | 2.9                |
| hsa-miR-193b-3p | 27.6      | 27.9      | 27.9      | 27.3      | 27.1      | 26.8      | 26.9       | 26.9       | 27.0       | 32.3      | 33.0      | 31.0      | 32.1      | 30.9      | 29.9      | 35.5       | 35.0       | 30.4       | 18.0  | 2.9                |
| hsa-let-7c      | 26.3      | 26.9      | 26.3      | 26.5      | 27.0      | 27.2      | 26.1       | 26.2       | 27.4       | 32.1      | 32.1      | 30.7      | 32.2      | 30.5      | 29.3      | 33.2       | 33.6       | 30.0       | 18.0  | 2.7                |
| hsa-miR-127-3p  | 27.6      | 28.0      | 27.8      | 27.8      | 27.6      | 27.5      | 27.6       | 27.5       | 27.7       | 33.1      | 35.0      | 31.6      | 32.4      | 30.7      | 29.8      | 33.6       | 34.0       | 30.7       | 18.0  | 2.7                |
| hsa-miR-31-5p   | 24.9      | 25.1      | 24.9      | 26.3      | 25.9      | 26.0      | 28.0       | 27.9       | 28.8       | 29.6      | 30.6      | 28.9      | 30.8      | 29.0      | 28.8      | 31.6       | 34.4       | 31.0       | 18.0  | 2.6                |
| hsa-miR-214-3p  | 27.0      | 27.1      | 26.9      | 26.6      | 26.6      | 26.9      | 26.5       | 26.2       | 26.9       | 31.7      | 32.6      | 31.3      | 32.5      | 30.8      | 29.3      | 32.6       | 33.1       | 30.0       | 18.0  | 2.6                |
| hsa-miR-29b-3p  | 27.9      | 28.3      | 28.5      | 30.2      | 29.9      | 28.8      | 30.4       | 30.7       | 32.6       | 34.0      | 34.1      | 32.1      | 33.8      | 32.7      | 31.5      | 35.2       | 36.9       | 33.3       | 18.0  | 2.6                |
| hsa-miR-125a-5p | 26.2      | 26.2      | 26.2      | 26.2      | 26.0      | 26.0      | 25.6       | 25.8       | 25.9       | 31.3      | 32.2      | 30.2      | 31.1      | 29.6      | 28.5      | 31.2       | 32.2       | 30.0       | 18.0  | 2.6                |
| hsa-miR-199a-3p | 24.6      | 24.7      | 24.6      | 24.7      | 24.6      | 24.8      | 25.0       | 24.8       | 26.6       | 29.9      | 30.4      | 28.5      | 29.8      | 28.3      | 27.0      | 30.2       | 31.4       | 28.0       | 18.0  | 2.5                |
| hsa-let-7d-5p   | 28.5      | 28.9      | 28.6      | 28.5      | 28.6      | 28.6      | 27.6       | 27.3       | 28.8       | 33.3      | 34.3      | 31.7      | 33.0      | 31.5      | 30.7      | 33.9       | 34.6       | 31.3       | 18.0  | 2.5                |
| hsa-miR-125b-5p | 22.3      | 22.5      | 22.7      | 23.2      | 22.8      | 22.8      | 23.1       | 23.3       | 23.8       | 27.2      | 27.8      | 26.6      | 27.8      | 26.0      | 25.6      | 28.2       | 29.9       | 26.8       | 18.0  | 2.4                |
| hsa-miR-31-3p   | 28.4      | 28.6      | 28.8      | 29.8      | 29.2      | 29.1      | 32.3       | 31.9       | 33.0       | 32.8      | 32.7      | 31.6      | 32.5      | 31.3      | 31.0      | 35.8       | 36.8       | 34.2       | 18.0  | 2.4                |
| hsa-let-7f-5p   | 28.6      | 28.6      | 28.5      | 28.2      | 28.3      | 28.4      | 27.6       | 27.1       | 30.7       | 32.9      | 33.3      | 32.3      | 32.9      | 31.6      | 31.1      | 34.1       | 34.0       | 31.2       | 18.0  | 2.4                |
| hsa-miR-423-3p  | 28.0      | 28.0      | 28.2      | 28.1      | 28.2      | 28.3      | 28.1       | 27.9       | 28.6       | 33.0      | 32.7      | 31.8      | 32.6      | 32.1      | 30.5      | 33.8       | 34.2       | 31.8       | 18.0  | 2.4                |
| hsa-let-7g-5p   | 26.9      | 27.0      | 26.9      | 26.8      | 27.0      | 27.1      | 26.9       | 26.6       | 28.1       | 32.2      | 32.3      | 30.0      | 31.3      | 30.0      | 29.0      | 33.1       | 32.7       | 29.8       | 18.0  | 2.4                |
| hsa-miR-107     | 27.8      | 28.2      | 27.9      | 28.4      | 28.1      | 28.3      | 28.3       | 27.9       | 29.7       | 32.6      | 33.1      | 31.3      | 33.0      | 30.9      | 29.8      | 33.2       | 35.2       | 30.8       | 18.0  | 2.4                |
| hsa-miR-320a    | 28.2      | 28.6      | 28.0      | 28.1      | 28.3      | 28.2      | 27.7       | 27.6       | 28.1       | 31.9      | 32.5      | 31.8      | 32.5      | 30.4      | 29.7      | 33.9       | 34.4       | 30.1       | 18.0  | 2.3                |
| hsa-miR-195-5p  | 30.2      | 29.8      | 30.0      | 30.1      | 30.2      | 29.7      | 30.8       | 30.7       | 32.6       | 34.5      | 35.2      | 33.2      | 36.0      | 32.8      | 31.4      | 35.0       | 35.8       | 33.1       | 18.0  | 2.3                |
| hsa-miR-424-5p  | 29.3      | 28.8      | 28.1      | 28.9      | 28.0      | 29.3      | 29.3       | 29.6       | 31.8       | 33.2      | 32.7      | 31.7      | 32.3      | 31.0      | 29.8      | 35.2       | 35.2       | 31.1       | 18.0  | 2.2                |
| hsa-miR-99b-5p  | 28.5      | 28.6      | 28.6      | 28.7      | 28.6      | 28.8      | 28.3       | 28.5       | 28.9       | 33.1      | 33.8      | 32.3      | 33.0      | 31.1      | 29.9      | 33.9       | 33.7       | 31.3       | 18.0  | 2.2                |
| hsa-miR-103a-3p | 26.1      | 26.5      | 26.1      | 26.7      | 26.6      | 26.4      | 26.6       | 26.5       | 27.5       | 30.8      | 31.3      | 29.4      | 30.8      | 29.7      | 27.9      | 31.5       | 32.2       | 29.3       | 18.0  | 2.2                |
| hsa-miR-222-3p  | 24.8      | 25.1      | 25.2      | 25.9      | 25.5      | 25.6      | 26.1       | 26.3       | 26.8       | 28.6      | 29.5      | 27.9      | 28.7      | 27.2      | 26.8      | 30.2       | 32.6       | 28.8       | 18.0  | 2.1                |
| hsa-miR-28-5p   | 30.5      | 30.4      | 30.2      | 30.5      | 30.2      | 30.1      | 30.8       | 30.8       | 32.4       | 34.4      | 35.2      | 34.1      | 34.0      | 33.5      | 32.6      | 33.8       | 35.8       | 35.6       | 18.0  | 2.1                |
| hsa-miR-221-3p  | 23.2      | 23.5      | 23.3      | 24.5      | 24.6      | 24.0      | 24.5       | 24.6       | 25.3       | 27.6      | 28.2      | 26.6      | 27.8      | 26.5      | 25.7      | 29.0       | 30.3       | 26.7       | 18.0  | 2.1                |
| hsa-miR-143-3p  | 29.7      | 28.8      | 29.0      | 28.9      | 29.0      | 29.1      | 27.8       | 27.6       | 29.9       | 33.3      | 33.0      | 31.5      | 32.5      | 31.1      | 29.4      | 33.5       | 34.4       | 30.6       | 18.0  | 2.1                |

## Supplementary data

|                 |      |      |      |      |      |      |      |      |      |      |      |      |      |      |      |      |      |      |      |     |
|-----------------|------|------|------|------|------|------|------|------|------|------|------|------|------|------|------|------|------|------|------|-----|
| hsa-miR-15a-5p  | 26.8 | 26.9 | 26.7 | 27.6 | 27.5 | 27.2 | 29.0 | 28.7 | 31.2 | 31.3 | 31.6 | 29.8 | 30.4 | 29.6 | 28.2 | 32.3 | 33.6 | 29.7 | 18.0 | 2.1 |
| hsa-miR-15b-5p  | 28.7 | 29.3 | 28.6 | 29.2 | 29.5 | 29.0 | 29.2 | 29.3 | 30.5 | 32.2 | 32.8 | 31.3 | 32.3 | 30.8 | 29.9 | 35.8 | 34.6 | 31.1 | 18.0 | 2.1 |
| hsa-miR-574-3p  | 29.1 | 29.1 | 28.8 | 29.1 | 28.8 | 28.7 | 28.9 | 28.7 | 28.9 | 32.9 | 32.8 | 31.8 | 32.8 | 31.7 | 30.9 | 33.3 | 34.9 | 32.3 | 18.0 | 2.1 |
| hsa-miR-19b-3p  | 27.3 | 27.5 | 27.6 | 27.8 | 27.5 | 26.8 | 29.0 | 29.2 | 31.0 | 31.6 | 31.0 | 29.1 | 29.7 | 29.1 | 28.2 | 32.3 | 34.6 | 29.9 | 18.0 | 2.1 |
| hsa-miR-379-5p  | 29.7 | 29.8 | 29.7 | 29.9 | 29.8 | 30.0 | 30.6 | 30.2 | 31.9 | 34.9 | 33.4 | 32.2 | 33.8 | 32.2 | 32.1 | 34.2 | 36.2 | 32.9 | 18.0 | 2.0 |
| hsa-miR-30a-5p  | 31.5 | 31.5 | 31.2 | 31.8 | 31.5 | 30.8 | 30.1 | 30.1 | 31.5 | 35.6 | 34.8 | 34.1 | 34.5 | 32.7 | 31.2 | 34.2 | 36.8 | 31.2 | 18.0 | 2.0 |
| hsa-miR-19a-3p  | 28.1 | 28.6 | 28.7 | 29.0 | 28.3 | 27.6 | 29.8 | 30.4 | 31.8 | 31.6 | 31.2 | 29.6 | 30.7 | 30.0 | 28.8 | 32.8 | 35.8 | 30.8 | 18.0 | 2.0 |
| hsa-miR-24-3p   | 25.1 | 25.0 | 25.0 | 25.5 | 25.4 | 25.2 | 25.0 | 24.9 | 26.3 | 29.0 | 29.7 | 28.1 | 29.2 | 27.8 | 26.8 | 29.5 | 30.8 | 27.3 | 18.0 | 2.0 |
| hsa-miR-181a-5p | 28.0 | 28.3 | 28.2 | 28.5 | 28.3 | 28.7 | 27.1 | 27.2 | 27.6 | 32.3 | 32.7 | 30.3 | 31.5 | 30.3 | 28.8 | 31.9 | 33.3 | 29.8 | 18.0 | 2.0 |
| hsa-miR-132-3p  | 30.5 | 30.3 | 31.0 | 30.2 | 29.8 | 30.5 | 30.0 | 30.5 | 30.4 | 34.3 | 33.2 | 33.9 | 35.3 | 32.1 | 31.1 | 33.7 | 36.0 | 31.6 | 18.0 | 2.0 |
| hsa-miR-148b-3p | 30.2 | 30.0 | 30.4 | 30.8 | 30.5 | 30.2 | 30.8 | 30.7 | 31.8 | 33.9 | 34.5 | 32.1 | 33.1 | 32.5 | 31.8 | 35.1 | 36.8 | 33.3 | 18.0 | 2.0 |
| hsa-miR-652-3p  | 32.5 | 32.3 | 31.8 | 32.5 | 31.9 | 32.0 | 31.6 | 31.9 | 31.9 | 36.9 | 35.1 | 33.1 | 36.1 | 33.8 | 31.7 | 36.3 | 37.0 | 32.8 | 18.0 | 1.9 |
| hsa-miR-374b-5p | 31.3 | 32.0 | 31.5 | 31.8 | 31.2 | 30.9 | 31.8 | 32.1 | 34.1 | 34.5 | 35.5 | 33.6 | 36.5 | 33.4 | 33.0 | 36.2 | 36.5 | 32.8 | 18.0 | 1.9 |
| hsa-miR-152     | 27.8 | 27.9 | 27.7 | 27.8 | 27.7 | 27.8 | 28.0 | 28.0 | 29.7 | 32.1 | 31.8 | 30.8 | 31.6 | 30.6 | 29.4 | 31.7 | 33.1 | 30.0 | 18.0 | 1.9 |
| hsa-miR-382-5p  | 30.3 | 30.9 | 30.1 | 30.7 | 31.1 | 31.0 | 31.0 | 30.6 | 31.3 | 33.2 | 35.7 | 33.2 | 34.3 | 32.8 | 31.3 | 35.0 | 35.7 | 32.5 | 18.0 | 1.9 |
| hsa-miR-423-5p  | 29.2 | 29.7 | 29.2 | 29.2 | 29.6 | 29.6 | 29.2 | 29.1 | 29.2 | 32.2 | 32.3 | 31.7 | 31.9 | 31.6 | 30.1 | 33.8 | 35.3 | 31.2 | 18.0 | 1.8 |
| hsa-miR-26b-5p  | 30.4 | 31.0 | 29.9 | 30.7 | 30.7 | 30.8 | 30.6 | 30.9 | 32.8 | 34.6 | 34.8 | 33.2 | 34.6 | 32.0 | 31.0 | 35.1 | 34.7 | 32.4 | 18.0 | 1.8 |
| hsa-miR-191-5p  | 28.6 | 29.0 | 28.5 | 29.0 | 29.0 | 28.8 | 29.0 | 29.1 | 29.7 | 32.7 | 32.9 | 31.6 | 32.7 | 31.3 | 30.2 | 32.9 | 33.7 | 31.3 | 18.0 | 1.8 |
| hsa-miR-99a-5p  | 28.5 | 29.5 | 28.6 | 28.9 | 28.8 | 29.1 | 29.1 | 29.0 | 30.7 | 32.3 | 32.9 | 31.8 | 32.5 | 30.6 | 29.7 | 33.3 | 33.9 | 30.9 | 18.0 | 1.8 |
| hsa-miR-23b-3p  | 27.0 | 26.9 | 26.9 | 27.4 | 27.2 | 27.0 | 26.5 | 26.7 | 27.8 | 30.8 | 31.0 | 29.5 | 30.7 | 29.1 | 27.8 | 31.0 | 31.7 | 28.8 | 18.0 | 1.8 |
| hsa-miR-140-3p  | 30.5 | 30.9 | 30.2 | 31.0 | 31.1 | 30.2 | 30.7 | 30.4 | 31.1 | 35.0 | 32.9 | 32.5 | 33.3 | 32.0 | 31.3 | 33.5 | 36.9 | 32.5 | 18.0 | 1.8 |
| hsa-miR-361-5p  | 28.4 | 28.8 | 28.6 | 28.8 | 28.6 | 28.5 | 29.0 | 28.7 | 30.0 | 32.5 | 33.5 | 31.1 | 32.0 | 31.1 | 30.0 | 32.1 | 33.5 | 30.5 | 18.0 | 1.8 |
| hsa-miR-23a-3p  | 24.7 | 24.7 | 24.8 | 25.4 | 25.0 | 24.7 | 24.7 | 24.9 | 26.0 | 28.4 | 28.6 | 27.2 | 28.4 | 26.9 | 25.8 | 28.8 | 30.2 | 26.9 | 18.0 | 1.8 |
| hsa-miR-151a-5p | 28.2 | 28.2 | 28.3 | 28.6 | 28.5 | 28.6 | 28.8 | 28.8 | 29.9 | 31.8 | 32.5 | 30.7 | 32.5 | 30.7 | 29.7 | 32.4 | 33.5 | 30.9 | 18.0 | 1.8 |
| hsa-miR-21-5p   | 22.7 | 23.0 | 23.0 | 23.2 | 22.9 | 23.0 | 22.9 | 23.0 | 24.7 | 26.3 | 26.9 | 25.6 | 26.6 | 25.1 | 23.9 | 27.0 | 27.8 | 24.7 | 18.0 | 1.7 |
| hsa-miR-30c-5p  | 28.8 | 29.5 | 29.2 | 29.8 | 29.0 | 28.7 | 29.6 | 29.6 | 30.9 | 32.9 | 32.3 | 30.8 | 32.2 | 30.7 | 29.9 | 32.7 | 34.1 | 30.8 | 18.0 | 1.6 |
| hsa-miR-16-5p   | 24.1 | 24.3 | 24.3 | 25.0 | 24.9 | 24.8 | 25.9 | 25.7 | 27.2 | 27.6 | 28.4 | 26.5 | 27.5 | 26.5 | 25.5 | 28.2 | 29.6 | 26.9 | 18.0 | 1.6 |
| hsa-miR-151a-3p | 31.4 | 31.8 | 31.4 | 31.9 | 31.7 | 32.2 | 33.0 | 32.4 | 35.3 | 34.6 | 34.6 | 34.0 | 34.3 | 33.5 | 32.7 | 36.4 | 36.1 | 34.0 | 18.0 | 1.6 |
| hsa-miR-301a-3p | 30.7 | 31.2 | 30.9 | 33.3 | 31.9 | 31.9 | 33.6 | 32.9 | 35.7 | 33.1 | 33.5 | 31.7 | 32.6 | 32.0 | 31.1 | 33.2 | 36.6 | 31.7 | 18.0 | 1.6 |
| hsa-miR-376a-3p | 32.1 | 31.4 | 32.0 | 31.2 | 32.0 | 31.0 | 32.4 | 31.9 | 35.0 | 34.2 | 34.5 | 33.7 | 34.1 | 33.2 | 32.3 | 35.9 | 36.1 | 33.5 | 18.0 | 1.6 |
| hsa-miR-411-5p  | 29.8 | 30.3 | 29.9 | 30.7 | 30.6 | 30.1 | 31.3 | 32.4 | 33.0 | 33.4 | 34.3 | 32.1 | 32.6 | 32.2 | 31.1 | 34.5 | 34.4 | 31.8 | 18.0 | 1.6 |
| hsa-miR-10b-5p  | 28.8 | 29.1 | 28.9 | 27.7 | 28.2 | 28.2 | 28.7 | 29.2 | 30.6 | 32.1 | 32.6 | 30.6 | 31.6 | 30.2 | 29.5 | 31.8 | 32.1 | 29.5 | 18.0 | 1.5 |
| hsa-miR-30e-5p  | 29.8 | 30.2 | 29.8 | 30.4 | 30.6 | 29.6 | 31.7 | 31.7 | 32.8 | 33.8 | 33.2 | 31.7 | 32.7 | 31.3 | 30.5 | 33.6 | 34.8 | 31.8 | 18.0 | 1.5 |

# Supplementary data

|                 |      |      |      |      |      |      |      |      |      |      |      |      |      |      |      |      |      |      |      |     |
|-----------------|------|------|------|------|------|------|------|------|------|------|------|------|------|------|------|------|------|------|------|-----|
| hsa-miR-154-5p  | 30.9 | 31.8 | 30.9 | 31.6 | 30.7 | 30.5 | 31.2 | 31.7 | 32.1 | 34.5 | 34.1 | 33.6 | 34.8 | 33.9 | 31.5 | 33.9 | 34.9 | 32.6 | 18.0 | 1.5 |
| hsa-miR-186-5p  | 29.8 | 30.6 | 30.1 | 30.5 | 29.6 | 29.3 | 30.2 | 30.5 | 31.4 | 33.0 | 32.9 | 31.0 | 32.8 | 31.1 | 30.0 | 33.4 | 34.7 | 31.2 | 18.0 | 1.5 |
| hsa-miR-27b-3p  | 27.7 | 27.6 | 27.3 | 28.1 | 27.1 | 27.3 | 27.2 | 27.0 | 28.3 | 30.7 | 30.7 | 29.5 | 30.4 | 28.9 | 27.8 | 30.4 | 31.6 | 28.3 | 18.0 | 1.5 |
| hsa-miR-30b-5p  | 30.1 | 30.1 | 29.3 | 30.2 | 29.7 | 29.2 | 30.0 | 30.0 | 31.7 | 33.0 | 32.7 | 31.0 | 32.7 | 31.0 | 29.8 | 32.9 | 34.3 | 31.6 | 18.0 | 1.5 |
| hsa-miR-106a-5p | 27.7 | 27.8 | 28.0 | 28.0 | 28.1 | 27.6 | 30.0 | 29.5 | 31.5 | 30.5 | 31.0 | 29.3 | 30.5 | 29.6 | 28.5 | 31.8 | 31.9 | 29.5 | 18.0 | 1.5 |
| hsa-miR-20a-5p  | 27.2 | 27.5 | 27.7 | 27.7 | 27.6 | 27.4 | 29.6 | 29.4 | 31.3 | 30.0 | 30.7 | 29.2 | 30.0 | 28.9 | 27.9 | 30.8 | 31.7 | 29.3 | 18.0 | 1.5 |
| hsa-miR-93-5p   | 28.5 | 28.3 | 28.5 | 29.3 | 29.1 | 28.8 | 29.8 | 29.7 | 30.6 | 31.0 | 31.8 | 29.6 | 30.7 | 29.7 | 28.7 | 31.6 | 33.8 | 30.0 | 18.0 | 1.4 |
| hsa-miR-101-3p  | 31.4 | 31.4 | 30.9 | 31.3 | 30.3 | 30.6 | 30.9 | 31.1 | 33.5 | 34.1 | 33.5 | 31.9 | 32.7 | 31.7 | 30.1 | 33.1 | 34.8 | 32.2 | 18.0 | 1.4 |
| hsa-miR-18b-5p  | 30.9 | 30.7 | 31.1 | 32.1 | 31.3 | 30.8 | 34.5 | 32.8 | 33.6 | 33.5 | 33.6 | 32.1 | 33.9 | 32.7 | 30.9 | 33.6 | 34.7 | 31.8 | 18.0 | 1.4 |
| hsa-miR-92a-3p  | 27.4 | 27.6 | 27.5 | 27.5 | 27.5 | 27.1 | 27.9 | 27.8 | 28.2 | 29.8 | 30.3 | 29.0 | 29.3 | 28.6 | 27.6 | 30.2 | 32.0 | 28.8 | 18.0 | 1.3 |
| hsa-miR-18a-5p  | 31.5 | 30.7 | 31.9 | 31.9 | 31.9 | 30.9 | 33.5 | 33.7 | 34.5 | 34.6 | 33.9 | 32.2 | 33.0 | 32.0 | 31.3 | 33.7 | 33.9 | 32.3 | 18.0 | 1.2 |
| hsa-miR-425-5p  | 31.7 | 31.6 | 32.3 | 32.3 | 31.8 | 31.8 | 32.0 | 32.6 | 32.6 | 34.6 | 35.2 | 32.9 | 33.5 | 32.8 | 31.9 | 34.6 | 35.2 | 33.0 | 18.0 | 1.2 |
| hsa-let-7d-3p   | 32.2 | 31.0 | 31.1 | 32.0 | 31.6 | 31.4 | 31.9 | 31.9 | 31.7 | 32.7 | 33.3 | 31.6 | 32.3 | 31.9 | 30.5 | 33.2 | 35.9 | 31.5 | 18.0 | 1.2 |
| hsa-miR-25-3p   | 30.1 | 30.0 | 29.9 | 30.8 | 30.8 | 30.3 | 31.6 | 31.4 | 32.5 | 32.4 | 32.6 | 30.6 | 31.1 | 30.8 | 29.7 | 32.2 | 33.7 | 30.9 | 18.0 | 1.1 |
| hsa-miR-126-3p  | 33.1 | 34.5 | 34.5 | 34.8 | 36.2 | 34.6 | 35.7 | 37.0 | ND   | 30.8 | 29.4 | 27.8 | 28.3 | 27.2 | 25.9 | 28.9 | 29.7 | 26.7 | 17.0 | 3.7 |
| hsa-miR-29a-3p  | 25.0 | 25.5 | 25.5 | 26.8 | 26.3 | 25.6 | ND   | 27.3 | 28.4 | 32.0 | 31.7 | 30.0 | 30.9 | 29.7 | 28.8 | 32.8 | 35.6 | 31.1 | 17.0 | 3.1 |
| hsa-miR-199a-5p | 26.5 | 26.5 | 26.2 | 26.0 | 25.8 | 25.6 | 26.8 | 26.6 | 27.6 | 33.1 | 33.7 | 31.1 | 32.6 | 31.0 | 29.3 | 33.1 | BF   | 30.8 | 17.0 | 3.0 |
| hsa-let-7e-5p   | 26.8 | 27.1 | 26.9 | 27.0 | 27.0 | 26.9 | 26.2 | 26.1 | 26.8 | 32.0 | 33.5 | 31.3 | ND   | 30.6 | 30.0 | 32.2 | 33.4 | 30.1 | 17.0 | 2.7 |
| hsa-miR-196a-5p | 30.3 | 31.0 | 30.6 | 30.1 | 30.5 | 30.6 | 31.0 | 29.7 | 31.7 | 36.5 | 36.6 | 33.9 | BF   | 34.2 | 32.8 | 36.5 | 36.9 | 34.3 | 17.0 | 2.6 |
| hsa-let-7a-5p   | 23.1 | 23.1 | 22.8 | 23.1 | ND   | 23.3 | 22.8 | 22.6 | 23.8 | 27.9 | 29.0 | 27.1 | 28.5 | 26.8 | 25.9 | 28.9 | 29.8 | 26.6 | 17.0 | 2.6 |
| hsa-miR-145-5p  | 28.0 | 27.6 | 27.6 | 27.6 | ND   | 27.1 | 24.9 | 24.8 | 25.6 | 31.3 | 30.9 | 29.6 | 30.8 | 29.2 | 27.8 | 31.0 | 32.3 | 28.0 | 17.0 | 2.3 |
| hsa-miR-181b-5p | 31.6 | 31.6 | 31.1 | 32.1 | 32.8 | 32.1 | 30.2 | 30.3 | 31.0 | 36.7 | 35.8 | 35.2 | 35.9 | 34.3 | 33.4 | 36.7 | ND   | 34.1 | 17.0 | 2.2 |
| hsa-miR-199b-5p | 26.5 | 26.9 | 26.9 | 27.3 | 27.0 | 27.0 | 27.7 | 27.7 | 29.5 | 31.6 | 32.8 | 30.5 | 32.0 | 30.5 | 29.0 | 32.5 | BF   | 30.6 | 17.0 | 2.2 |
| hsa-miR-486-5p  | 34.7 | 34.1 | ND   | 35.2 | 34.0 | 34.5 | 35.8 | 35.2 | 36.6 | 31.8 | 32.3 | 30.4 | 31.1 | 30.9 | 29.9 | 32.5 | 33.5 | 30.6 | 17.0 | 2.1 |
| hsa-miR-708-5p  | 29.1 | 28.9 | 29.8 | 31.0 | 30.5 | 30.4 | 31.2 | 31.7 | 32.3 | 32.7 | 33.8 | 32.3 | 35.6 | 32.2 | 32.3 | 35.6 | ND   | 34.8 | 17.0 | 2.1 |
| hsa-miR-100-5p  | 24.2 | 24.5 | 24.5 | 25.5 | 25.2 | 25.1 | 25.8 | 25.9 | 26.8 | 28.2 | 29.0 | 27.6 | ND   | 27.1 | 26.6 | 29.3 | 30.7 | 27.7 | 17.0 | 1.9 |
| hsa-miR-26a-5p  | 25.9 | 26.2 | 25.7 | 26.3 | 26.0 | 26.0 | 26.0 | 26.0 | 27.5 | 30.3 | 30.5 | 28.9 | 30.1 | 28.8 | 27.5 | 30.7 | BF   | 28.2 | 17.0 | 1.9 |
| hsa-miR-155-5p  | 30.0 | 30.1 | 30.1 | 31.2 | 30.9 | 31.0 | 33.2 | 32.6 | 32.9 | 33.9 | 35.9 | 33.1 | BF   | 33.4 | 32.3 | 34.7 | 35.4 | 34.2 | 17.0 | 1.8 |
| hsa-miR-374a-5p | 31.1 | 31.6 | 31.4 | 32.0 | 31.5 | 30.7 | 31.8 | 32.0 | 34.6 | 34.7 | 35.8 | 34.2 | 35.7 | 33.6 | 33.2 | 35.7 | BF   | 35.1 | 17.0 | 1.8 |
| hsa-miR-98-5p   | 32.0 | 31.9 | 32.1 | 32.2 | 32.2 | 32.6 | 32.2 | 31.7 | 34.1 | 36.6 | 35.7 | 34.2 | 36.2 | 34.7 | 34.5 | BF   | 36.6 | 34.9 | 17.0 | 1.8 |
| hsa-miR-487b    | 31.6 | 32.2 | 32.3 | 32.7 | 31.8 | 31.5 | 32.0 | 32.3 | 32.8 | 36.3 | 35.5 | 35.0 | 35.6 | 34.9 | 32.9 | 36.3 | BF   | 34.8 | 17.0 | 1.7 |
| hsa-miR-484     | 30.0 | 30.3 | 30.8 | 30.8 | 30.5 | 30.3 | 30.7 | 30.5 | 30.8 | 33.8 | 34.0 | 32.8 | 34.0 | 32.9 | 32.0 | 35.5 | BF   | 33.7 | 17.0 | 1.7 |
| hsa-miR-409-3p  | 28.8 | 29.1 | 29.6 | 29.5 | 29.1 | 29.2 | 29.6 | 29.2 | 29.7 | 32.5 | 33.9 | 31.5 | ND   | 32.2 | 30.6 | 33.2 | 33.2 | 31.5 | 17.0 | 1.7 |

## Supplementary data

|                 |      |      |      |      |      |      |      |      |      |      |      |      |      |      |      |      |      |      |      |     |
|-----------------|------|------|------|------|------|------|------|------|------|------|------|------|------|------|------|------|------|------|------|-----|
| hsa-miR-337-3p  | 31.3 | 31.8 | 31.9 | 31.8 | 30.9 | 30.9 | 32.0 | 32.0 | 35.2 | BF   | 34.5 | 35.1 | 34.5 | 33.5 | 33.0 | 34.7 | 36.6 | 32.8 | 17.0 | 1.7 |
| hsa-miR-106b-5p | 28.6 | 29.2 | 29.2 | 30.0 | 29.7 | 28.9 | 31.4 | 30.8 | 32.9 | 32.5 | 33.6 | 30.7 | 32.2 | 30.7 | 29.9 | 33.9 | BF   | 31.2 | 17.0 | 1.6 |
| hsa-miR-376b-3p | 32.1 | 32.1 | 32.6 | 33.0 | 32.0 | 31.9 | 33.8 | 33.9 | 35.1 | 36.6 | 35.9 | 34.7 | 35.2 | 34.2 | 33.2 | 36.5 | ND   | 34.7 | 17.0 | 1.6 |
| hsa-miR-140-5p  | 30.8 | 31.0 | 31.2 | 31.7 | 31.0 | 30.8 | 31.9 | 31.5 | 32.6 | 34.9 | 34.5 | 33.6 | 34.9 | 32.6 | 32.8 | 34.3 | ND   | 32.7 | 17.0 | 1.5 |
| hsa-miR-532-5p  | 32.2 | 32.1 | 32.1 | 33.0 | 32.1 | 32.1 | 31.5 | 32.7 | 32.8 | 35.3 | 35.3 | 34.8 | 34.1 | 34.8 | 33.8 | 35.1 | BF   | 34.2 | 17.0 | 1.3 |
| hsa-miR-323a-3p | 33.0 | 32.5 | 33.1 | 33.9 | 33.5 | 33.2 | 33.7 | 34.5 | 34.7 | 36.1 | 35.2 | 34.2 | 35.3 | 35.9 | 34.6 | BF   | 36.7 | 36.7 | 17.0 | 1.3 |
| hsa-miR-660-5p  | 31.9 | 32.1 | 31.6 | 33.0 | 31.4 | 31.2 | 31.9 | 32.6 | 33.1 | 34.4 | 34.1 | 34.2 | 34.1 | 33.6 | 32.0 | 34.7 | ND   | 33.7 | 17.0 | 1.2 |
| hsa-miR-378a-3p | 32.6 | 32.3 | 32.2 | 32.5 | 33.1 | 32.4 | 34.6 | 34.9 | 34.4 | 34.9 | 34.3 | 33.7 | 35.0 | 33.5 | 32.3 | 35.6 | ND   | 34.4 | 17.0 | 1.1 |
| hsa-miR-215     | 35.8 | 36.8 | BF   | 36.9 | 35.6 | 36.7 | 35.8 | 36.9 | 36.8 | 36.9 | 36.9 | 35.5 | 36.4 | 34.8 | 33.7 | 37.0 | 35.5 | 34.5 | 17.0 | 1.0 |
| hsa-miR-194-5p  | 36.2 | 34.8 | 34.7 | 35.0 | 36.3 | 35.1 | BF   | 35.5 | 36.7 | 35.7 | 36.1 | 34.2 | 34.9 | 34.6 | 33.1 | 36.7 | 36.3 | 34.7 | 17.0 | 1.0 |
| hsa-miR-130a-3p | 29.6 | 30.0 | 29.6 | 29.8 | 29.8 | 29.3 | 30.1 | 30.1 | 31.6 | 36.8 | BF   | 34.5 | 34.9 | 34.1 | 32.3 | ND   | 36.5 | 34.0 | 16.0 | 2.7 |
| hsa-miR-27a-3p  | 28.1 | 28.9 | ND   | 28.1 | 28.2 | 27.7 | 28.0 | 28.1 | 30.7 | ND   | 31.6 | 31.2 | 32.4 | 30.7 | 28.8 | 33.9 | 34.0 | 30.1 | 16.0 | 2.1 |
| hsa-miR-342-3p  | 30.2 | 30.7 | 30.2 | 30.8 | 30.6 | 30.7 | 30.5 | 30.7 | 31.2 | ND   | 35.8 | 32.7 | 34.5 | 33.2 | 31.8 | 35.2 | ND   | 32.8 | 16.0 | 1.8 |
| hsa-miR-432-5p  | 32.1 | 32.8 | 32.1 | 32.8 | 32.7 | 32.6 | 32.2 | 31.8 | 32.1 | 36.2 | BF   | 35.8 | 35.9 | 35.9 | 33.2 | BF   | 36.5 | 33.9 | 16.0 | 1.7 |
| hsa-miR-454-3p  | 31.6 | 31.7 | 30.8 | 32.0 | 32.4 | 32.6 | 32.2 | 32.7 | 34.1 | 35.3 | 36.0 | 34.8 | 35.1 | 34.9 | 33.0 | BF   | ND   | 34.1 | 16.0 | 1.6 |
| hsa-miR-493-3p  | 32.1 | 32.5 | 32.5 | 32.3 | 33.1 | 32.5 | 32.8 | 32.7 | 33.6 | 36.8 | ND   | 34.8 | 35.7 | 35.0 | 33.9 | ND   | 36.6 | 34.6 | 16.0 | 1.6 |
| hsa-miR-505-3p  | 33.1 | 33.0 | 33.2 | 33.6 | 32.7 | 32.8 | 32.2 | 32.9 | 33.2 | BF   | 35.7 | 35.6 | 35.2 | 34.0 | 33.0 | 36.7 | ND   | 34.1 | 16.0 | 1.3 |
| hsa-miR-590-5p  | 33.4 | 33.5 | 34.1 | 35.0 | 33.8 | 33.4 | 35.5 | 34.7 | 36.6 | BF   | 36.8 | 35.6 | 36.1 | 36.1 | 34.7 | BF   | 36.5 | 35.5 | 16.0 | 1.2 |
| hsa-miR-17-5p   | 33.7 | 33.2 | 34.0 | 33.4 | 34.5 | 34.2 | 36.3 | 34.7 | 35.2 | 34.9 | 36.2 | 35.9 | 35.7 | 35.1 | 33.3 | BF   | ND   | 35.5 | 16.0 | 1.0 |
| hsa-miR-410     | 33.6 | 34.6 | 33.8 | 34.5 | 33.7 | 33.7 | 33.6 | 35.2 | 34.8 | 35.9 | 35.7 | 34.7 | 35.0 | 34.3 | 33.4 | BF   | ND   | 34.9 | 16.0 | 0.8 |
| hsa-miR-497-5p  | 30.2 | 30.1 | 30.2 | 30.5 | 30.1 | 30.0 | 30.9 | 30.7 | 31.9 | ND   | BF   | 35.5 | 34.7 | 34.5 | 33.0 | 36.7 | ND   | 33.6 | 15.0 | 2.3 |
| hsa-miR-193a-5p | 29.7 | 30.1 | 29.8 | 30.6 | 30.1 | 30.3 | ND   | 30.7 | 30.6 | 35.0 | 34.6 | 34.4 | 35.5 | 33.2 | 32.8 | BF   | BF   | 35.1 | 15.0 | 2.3 |
| hsa-miR-22-5p   | 30.2 | 30.0 | 30.1 | 30.1 | 30.1 | 29.8 | 30.8 | 29.9 | 31.8 | ND   | ND   | 35.2 | 35.4 | 34.1 | 32.8 | 34.8 | ND   | 34.2 | 15.0 | 2.2 |
| hsa-miR-324-5p  | 31.6 | 31.7 | 31.3 | 32.5 | 31.4 | 31.3 | 31.8 | 31.6 | 32.1 | 35.9 | BF   | 34.2 | 36.8 | BF   | 34.9 | 36.3 | BF   | 35.8 | 15.0 | 2.1 |
| hsa-miR-92b-3p  | 31.8 | 32.2 | 31.5 | 31.0 | 31.9 | 31.1 | 31.1 | 31.5 | 31.5 | 35.6 | 36.9 | 34.7 | BF   | 34.1 | 33.8 | BF   | ND   | 34.5 | 15.0 | 1.9 |
| hsa-miR-299-5p  | 31.1 | 31.7 | 31.8 | 31.7 | 31.5 | 30.9 | 31.7 | 32.0 | 32.8 | BF   | 35.5 | 35.1 | 35.9 | 35.1 | 33.4 | 35.8 | ND   | ND   | 15.0 | 1.9 |
| hsa-miR-137     | 31.5 | 31.4 | 31.8 | 32.2 | 31.9 | 32.8 | 31.5 | 31.6 | 34.3 | 35.9 | 36.3 | 35.8 | BF   | 35.2 | 34.5 | BF   | BF   | 34.5 | 15.0 | 1.9 |
| hsa-miR-328     | 32.9 | 33.4 | 32.8 | 33.1 | 31.5 | 32.7 | 33.1 | 32.9 | 33.2 | ND   | BF   | 36.8 | 36.9 | 36.6 | 34.3 | 36.5 | ND   | 36.2 | 15.0 | 1.8 |
| hsa-miR-218-5p  | 30.7 | 31.0 | 31.1 | 32.3 | 31.6 | 31.4 | 33.6 | 33.4 | 35.9 | 34.7 | 35.4 | 35.1 | 35.2 | 34.2 | 34.0 | BF   | ND   | BF   | 15.0 | 1.8 |
| hsa-miR-30e-3p  | 31.9 | 32.5 | 32.1 | 32.7 | 32.1 | 32.8 | 30.9 | 31.7 | 33.2 | 35.6 | BF   | 36.0 | 36.8 | 35.3 | 32.3 | BF   | BF   | 33.5 | 15.0 | 1.8 |
| hsa-miR-149-5p  | 32.7 | 33.0 | 31.9 | 32.9 | 34.1 | 31.8 | 32.4 | 33.1 | 31.9 | BF   | 36.3 | 36.0 | BF   | 36.7 | 33.7 | 36.3 | ND   | 34.8 | 15.0 | 1.8 |
| hsa-miR-485-3p  | 32.2 | 32.9 | 32.7 | 33.0 | 32.8 | 31.8 | 31.9 | 31.7 | 32.4 | 36.2 | 35.5 | ND   | 35.7 | 35.0 | 35.2 | ND   | ND   | 35.3 | 15.0 | 1.6 |
| hsa-miR-210     | 31.8 | 32.6 | 32.7 | 34.2 | 33.0 | 32.1 | 33.6 | ND   | 33.6 | 35.6 | 35.6 | 34.7 | 35.8 | BF   | 33.5 | BF   | 36.9 | 34.8 | 15.0 | 1.5 |

## Supplementary data

|                 |      |      |      |      |      |      |      |      |      |      |      |      |      |      |      |      |      |      |      |     |
|-----------------|------|------|------|------|------|------|------|------|------|------|------|------|------|------|------|------|------|------|------|-----|
| hsa-miR-224-5p  | 32.8 | 32.4 | 32.6 | 33.0 | 33.1 | 33.2 | 35.2 | 34.5 | 35.6 | BF   | 36.0 | 35.2 | 36.8 | 35.3 | 34.8 | BF   | ND   | 35.3 | 15.0 | 1.4 |
| hsa-miR-185-5p  | 33.0 | 33.3 | 33.0 | 33.2 | ND   | 34.0 | 33.9 | 33.7 | 35.9 | 36.2 | ND   | 34.8 | 35.5 | 34.4 | 33.0 | 36.9 | BF   | 34.2 | 15.0 | 1.3 |
| hsa-miR-204-5p  | 33.0 | BF   | 33.0 | 34.2 | 34.8 | 32.0 | 34.9 | 36.1 | 34.0 | 36.2 | ND   | 33.9 | 35.5 | 34.2 | 33.2 | 35.1 | ND   | 33.7 | 15.0 | 1.2 |
| hsa-miR-192-5p  | 35.8 | 36.2 | 35.5 | 33.9 | 35.1 | 34.2 | ND   | 36.1 | ND   | 34.1 | 34.7 | 33.6 | 34.3 | 35.0 | 32.2 | 36.3 | ND   | 33.2 | 15.0 | 1.2 |
| hsa-miR-503-5p  | 32.6 | 30.6 | 31.2 | 31.4 | 30.3 | 31.2 | 33.0 | 32.2 | 34.5 | 36.5 | 35.3 | 36.5 | ND   | 36.9 | 34.9 | ND   | ND   | ND   | 14.0 | 2.4 |
| hsa-miR-136-5p  | 28.7 | 28.9 | 28.8 | 29.4 | 28.5 | 28.2 | 29.7 | 29.9 | 31.1 | ND   | BF   | 34.1 | 34.6 | 33.9 | 31.9 | BF   | BF   | 33.5 | 14.0 | 2.4 |
| hsa-miR-197-3p  | 28.9 | 29.5 | 29.2 | 29.9 | 29.4 | 29.7 | ND   | 29.5 | 29.2 | BF   | 33.7 | 33.5 | ND   | 33.0 | 32.3 | ND   | 36.0 | 32.2 | 14.0 | 2.3 |
| hsa-miR-130b-3p | 31.9 | 32.2 | 32.3 | 33.4 | 33.5 | 32.8 | 33.2 | 33.5 | 35.5 | BF   | BF   | 35.8 | 35.9 | 34.3 | 34.2 | ND   | ND   | 35.7 | 14.0 | 1.4 |
| hsa-miR-425-3p  | 33.7 | 34.4 | 34.6 | 34.2 | 33.5 | 33.6 | 33.7 | 33.5 | 34.2 | ND   | 37.0 | BF   | 36.9 | 35.8 | 33.7 | ND   | BF   | 36.8 | 14.0 | 1.3 |
| hsa-miR-539-5p  | 32.3 | 33.0 | 32.7 | 32.8 | 33.5 | 32.4 | 33.6 | 32.8 | 35.1 | 36.0 | ND   | 36.0 | ND   | 35.1 | 34.7 | ND   | ND   | 34.5 | 14.0 | 1.3 |
| hsa-miR-146b-5p | 33.2 | 33.2 | 32.8 | 35.0 | 34.3 | 33.0 | 34.0 | 33.6 | 36.0 | 36.8 | BF   | 34.6 | ND   | 36.6 | 35.0 | ND   | ND   | 35.0 | 14.0 | 1.3 |
| hsa-miR-455-5p  | 33.2 | 32.8 | 33.4 | 34.3 | 33.0 | 32.7 | 32.3 | 33.7 | 34.4 | 35.9 | 35.0 | 35.8 | ND   | 35.5 | 34.8 | ND   | ND   | BF   | 14.0 | 1.2 |
| hsa-miR-30d-5p  | 33.7 | 34.8 | 33.8 | 34.8 | 34.1 | 33.4 | 34.1 | 33.7 | 35.8 | BF   | ND   | 36.2 | 36.8 | 36.6 | 33.9 | BF   | ND   | 35.4 | 14.0 | 1.2 |
| hsa-miR-452-5p  | 34.5 | 34.8 | 33.4 | 34.9 | 34.8 | 34.2 | 36.9 | 34.8 | 36.7 | ND   | BF   | 35.4 | ND   | 36.1 | 36.3 | ND   | 36.9 | 36.5 | 14.0 | 1.1 |
| hsa-miR-301b    | 33.8 | 35.0 | 33.9 | 34.8 | 33.9 | 35.5 | 36.9 | 36.3 | BF   | ND   | 37.0 | 35.1 | 35.6 | 36.7 | 35.5 | BF   | ND   | 34.5 | 14.0 | 1.1 |
| hsa-miR-377-3p  | 30.9 | 32.0 | 31.5 | 32.1 | 30.9 | 31.0 | 32.6 | 32.8 | 34.6 | BF   | BF   | 36.4 | 36.7 | BF   | 34.8 | ND   | BF   | 35.0 | 13.0 | 2.1 |
| hsa-miR-196b-5p | 31.7 | 31.6 | 32.0 | 32.2 | 31.9 | 32.1 | 31.9 | 31.5 | 32.7 | ND   | ND   | 35.7 | ND   | 34.8 | BF   | 36.7 | ND   | 36.3 | 13.0 | 1.9 |
| hsa-miR-337-5p  | 32.6 | 33.2 | 32.3 | 32.6 | 32.7 | 33.0 | 34.0 | 33.2 | 34.8 | ND   | BF   | 36.5 | BF   | 36.3 | 35.0 | ND   | ND   | 36.8 | 13.0 | 1.6 |
| hsa-miR-339-5p  | 32.5 | 32.6 | 33.5 | 33.4 | 33.4 | 33.1 | 33.6 | 35.1 | 34.6 | ND   | BF   | 36.3 | BF   | 36.7 | 36.6 | 36.9 | ND   | ND   | 13.0 | 1.6 |
| hsa-miR-629-5p  | 33.6 | 33.0 | 32.8 | 34.3 | 35.3 | 35.1 | 34.8 | 35.7 | 35.1 | 36.1 | ND   | 36.4 | ND   | 37.0 | 35.7 | ND   | ND   | ND   | 13.0 | 1.3 |
| hsa-miR-433     | 34.0 | 33.5 | 34.0 | 33.9 | 33.9 | 33.9 | 34.6 | 33.9 | 33.6 | BF   | BF   | 36.6 | ND   | 36.6 | 34.0 | ND   | BF   | 34.9 | 13.0 | 1.0 |
| hsa-miR-10a-5p  | 33.3 | 33.1 | 33.0 | 33.0 | 34.1 | 33.5 | 34.0 | 33.2 | 34.8 | 35.3 | BF   | BF   | BF   | 35.0 | 34.7 | BF   | ND   | 36.1 | 13.0 | 1.0 |
| hsa-miR-421     | 33.9 | 33.9 | 33.5 | 34.7 | 34.0 | 33.9 | 34.1 | 35.9 | 34.5 | ND   | ND   | 34.2 | 37.0 | BF   | 34.3 | ND   | ND   | 35.4 | 13.0 | 1.0 |
| hsa-miR-877-5p  | 34.5 | 36.1 | ND   | 34.6 | 35.1 | 34.5 | 35.0 | 34.9 | 34.1 | 35.9 | BF   | 34.8 | ND   | 34.2 | 33.9 | 35.4 | ND   | ND   | 13.0 | 0.7 |
| hsa-miR-138-5p  | 30.5 | ND   | 31.1 | ND   | 33.2 | 32.5 | 33.6 | 33.5 | ND   | 36.2 | 36.9 | ND   | 36.8 | 34.8 | 34.3 | ND   | ND   | 36.9 | 12.0 | 2.2 |
| hsa-miR-95      | 36.2 | ND   | ND   | 35.9 | 35.2 | 33.8 | 31.6 | 31.3 | 33.2 | 35.0 | ND   | 35.6 | ND   | 35.5 | 35.8 | ND   | ND   | 33.6 | 12.0 | 1.7 |
| hsa-miR-874     | 32.4 | 33.1 | 33.0 | 33.6 | 32.9 | 33.6 | 31.7 | 32.4 | 32.6 | ND   | ND   | ND   | 35.1 | 36.7 | 34.5 | ND   | ND   | BF   | 12.0 | 1.4 |
| hsa-miR-331-3p  | 34.4 | 33.1 | 34.6 | 33.2 | 33.6 | 34.1 | 32.3 | 33.5 | 34.0 | ND   | BF   | 36.1 | BF   | 36.0 | 35.0 | BF   | ND   | BF   | 12.0 | 1.1 |
| hsa-miR-766-3p  | 34.7 | 35.8 | 34.1 | ND   | 35.2 | 35.5 | 32.6 | ND   | 35.0 | 36.0 | ND   | 36.0 | ND   | 36.1 | ND   | 36.1 | ND   | 36.1 | 12.0 | 1.1 |
| hsa-miR-99a-3p  | 33.1 | 33.6 | 33.8 | 34.3 | 33.1 | 33.6 | 35.0 | 33.9 | ND   | ND   | ND   | 36.1 | ND   | 34.8 | 35.9 | ND   | ND   | 35.2 | 12.0 | 1.0 |
| hsa-miR-212-3p  | 34.2 | 34.6 | 35.3 | 34.3 | 33.1 | 36.0 | 33.9 | 33.9 | 33.8 | ND   | ND   | ND   | ND   | 36.0 | 34.5 | ND   | ND   | 35.0 | 12.0 | 0.9 |
| hsa-miR-335-5p  | 36.6 | 35.2 | 36.9 | 35.9 | 36.7 | 34.8 | BF   | ND   | BF   | BF   | 35.7 | 36.0 | 35.7 | 35.5 | 34.2 | ND   | ND   | 34.9 | 12.0 | 0.8 |
| hsa-miR-32-5p   | 32.1 | 32.8 | 32.1 | 32.3 | 31.6 | 31.2 | 32.7 | 32.9 | 34.9 | ND   | ND   | ND   | ND   | 37.0 | 35.9 | ND   | ND   | ND   | 11.0 | 1.9 |





## Supplementary data

|                 |      |      |      |      |      |      |      |      |      |      |      |      |      |      |      |      |    |      |     |     |
|-----------------|------|------|------|------|------|------|------|------|------|------|------|------|------|------|------|------|----|------|-----|-----|
| hsa-miR-200a-3p | ND   | ND   | ND   | ND   | ND   | 36.4 | ND   | ND   | ND   | ND   | ND   | 36.5 | 35.8 | 36.6 | ND   | ND   | ND | ND   | 4.0 | 0.4 |
| hsa-miR-887     | 36.1 | BF   | BF   | BF   | 36.3 | ND   | BF   | 36.7 | 36.1 | ND   | ND   | ND   | ND   | ND   | ND   | ND   | ND | BF   | 4.0 | 0.3 |
| hsa-miR-934     | BF   | 37.0 | 36.9 | BF   | ND   | BF   | BF   | 36.9 | ND   | BF   | ND   | BF   | ND   | BF   | 36.6 | BF   | BF | BF   | 4.0 | 0.2 |
| hsa-miR-134     | 31.2 | 31.5 | BF   | BF   | 31.4 | 31.2 | BF   | BF   | BF   | BF   | BF   | BF   | BF   | BF   | BF   | BF   | BF | BF   | 4.0 | 0.2 |
| hsa-miR-582-5p  | ND   | BF   | ND   | 36.4 | ND   | 36.5 | ND   | ND   | ND   | 36.6 | ND   | 36.5 | BF   | ND   | ND   | ND   | ND | ND   | 4.0 | 0.1 |
| hsa-miR-141-3p  | 36.8 | 35.6 | ND   | ND   | ND   | BF   | ND   | ND   | ND   | ND   | ND   | BF   | 37.0 | ND   | BF   | BF   | ND | ND   | 3.0 | 0.7 |
| hsa-miR-135a-5p | 36.5 | ND   | BF   | BF   | ND   | BF   | ND   | ND   | ND   | BF   | BF   | 36.0 | ND   | ND   | BF   | 36.9 | ND | ND   | 3.0 | 0.5 |
| hsa-miR-302d-3p | ND   | ND   | ND   | ND   | ND   | 36.4 | ND   | 36.6 | ND   | ND   | ND   | ND   | ND   | ND   | ND   | ND   | ND | 36.8 | 3.0 | 0.2 |
| hsa-miR-576-3p  | 35.1 | 36.8 | ND   | BF   | BF   | ND   | BF   | BF   | ND   | ND   | ND   | ND   | ND   | ND   | ND   | ND   | ND | ND   | 2.0 | 1.2 |
| hsa-miR-187-3p  | ND   | ND   | 36.6 | ND   | ND   | ND   | ND   | 35.6 | ND   | ND   | ND   | ND   | ND   | ND   | ND   | ND   | ND | ND   | 2.0 | 0.7 |
| hsa-miR-499a-5p | BF   | ND   | ND   | ND   | ND   | ND   | ND   | ND   | ND   | ND   | 36.9 | BF   | ND   | ND   | 36.0 | ND   | ND | ND   | 2.0 | 0.6 |
| hsa-miR-651     | 36.0 | ND   | ND   | ND   | ND   | ND   | 36.7 | ND   | ND   | ND   | ND   | ND   | BF   | ND   | ND   | ND   | ND | ND   | 2.0 | 0.5 |
| hsa-miR-198     | 36.9 | ND   | ND   | BF   | 36.6 | ND   | ND   | ND   | ND   | ND   | ND   | ND   | ND   | ND   | ND   | ND   | ND | ND   | 2.0 | 0.2 |
| hsa-miR-187-5p  | ND   | 36.8 | ND   | ND   | ND   | ND   | ND   | ND   | ND   | BF   | BF   | ND   | ND   | BF   | 36.6 | ND   | ND | ND   | 2.0 | 0.2 |
| hsa-miR-549a    | 36.8 | BF   | ND   | ND   | BF   | 36.6 | BF   | ND   | ND   | ND   | ND   | ND   | ND   | ND   | ND   | ND   | ND | BF   | 2.0 | 0.2 |
| hsa-miR-551b-3p | ND   | ND   | ND   | ND   | 36.7 | ND   | ND   | ND   | ND   | ND   | ND   | ND   | 36.6 | ND   | BF   | ND   | ND | ND   | 2.0 | 0.1 |
| hsa-miR-345-5p  | BF   | BF   | BF   | 36.7 | ND   | 36.6 | ND   | ND   | BF   | ND   | ND   | ND   | ND   | ND   | ND   | ND   | ND | ND   | 2.0 | 0.1 |
| hsa-miR-96-5p   | ND   | ND   | ND   | ND   | ND   | 36.7 | ND   | ND   | ND   | ND   | ND   | ND   | ND   | ND   | ND   | ND   | ND | ND   | 1.0 | ND  |
| hsa-miR-9-5p    | ND   | ND   | ND   | ND   | ND   | ND   | ND   | ND   | ND   | ND   | ND   | ND   | ND   | ND   | 36.4 | ND   | ND | ND   | 1.0 | ND  |
| hsa-miR-760     | ND   | BF   | ND   | ND   | ND   | ND   | ND   | ND   | ND   | ND   | ND   | ND   | ND   | ND   | 34.7 | ND   | ND | ND   | 1.0 | ND  |
| hsa-miR-662     | ND   | ND   | BF   | ND   | ND   | 36.8 | ND   | ND   | ND   | ND   | ND   | ND   | BF   | ND   | ND   | ND   | ND | ND   | 1.0 | ND  |
| hsa-miR-627     | 35.9 | ND   | ND   | BF   | ND   | BF   | ND   | ND   | ND   | ND   | ND   | ND   | ND   | ND   | ND   | ND   | ND | ND   | 1.0 | ND  |
| hsa-miR-545-3p  | ND   | BF   | ND   | BF   | BF   | 36.4 | ND   | ND   | ND   | ND   | ND   | ND   | ND   | ND   | ND   | ND   | ND | ND   | 1.0 | ND  |
| hsa-miR-519a-3p | ND   | ND   | ND   | ND   | ND   | ND   | ND   | ND   | ND   | ND   | ND   | ND   | ND   | 37.0 | ND   | ND   | ND | ND   | 1.0 | ND  |
| hsa-miR-518c-3p | ND   | ND   | ND   | ND   | ND   | ND   | ND   | ND   | ND   | ND   | ND   | ND   | ND   | ND   | ND   | ND   | ND | 36.7 | 1.0 | ND  |
| hsa-miR-509-3p  | ND   | ND   | ND   | ND   | ND   | ND   | ND   | ND   | 36.3 | ND   | ND   | ND   | ND   | ND   | BF   | ND   | ND | ND   | 1.0 | ND  |
| hsa-miR-483-3p  | ND   | ND   | ND   | ND   | ND   | ND   | ND   | ND   | 34.2 | ND   | BF   | BF   | BF   | BF   | ND   | ND   | ND | BF   | 1.0 | ND  |
| hsa-miR-383     | 36.6 | ND   | ND   | ND   | ND   | ND   | ND   | ND   | ND   | ND   | ND   | ND   | ND   | ND   | ND   | ND   | ND | ND   | 1.0 | ND  |
| hsa-miR-375     | ND   | ND   | ND   | ND   | ND   | ND   | ND   | ND   | ND   | ND   | ND   | ND   | ND   | ND   | ND   | ND   | ND | 35.6 | 1.0 | ND  |
| hsa-miR-373-5p  | ND   | ND   | ND   | ND   | ND   | BF   | ND   | ND   | ND   | ND   | ND   | ND   | ND   | BF   | 36.1 | ND   | ND | ND   | 1.0 | ND  |
| hsa-miR-372     | 35.7 | ND   | ND   | ND   | ND   | ND   | ND   | ND   | ND   | ND   | ND   | ND   | ND   | ND   | ND   | ND   | ND | ND   | 1.0 | ND  |
| hsa-miR-362-5p  | BF   | BF   | BF   | BF   | 33.8 | BF   | BF   | BF   | BF   | BF   | BF   | BF   | BF   | BF   | BF   | BF   | BF | BF   | 1.0 | ND  |
| hsa-miR-34c-3p  | ND   | ND   | ND   | ND   | ND   | ND   | ND   | ND   | ND   | ND   | ND   | ND   | ND   | 36.7 | ND   | BF   | ND | ND   | 1.0 | ND  |





## Supplementary data

|                         |     |     |     |     |     |     |     |     |     |     |     |     |     |     |     |     |     |     |     |    |
|-------------------------|-----|-----|-----|-----|-----|-----|-----|-----|-----|-----|-----|-----|-----|-----|-----|-----|-----|-----|-----|----|
| <b>hsa-miR-206</b>      | BF  | ND  | BF  | BF  | ND  | BF  | ND  | BF  | BF  | BF  | BF  | BF  | BF  | BF  | BF  | BF  | BF  | ND  | 0.0 | ND |
| <b>hsa-miR-200b-3p</b>  | ND  | ND  | ND  | ND  | ND  | ND  | ND  | BF  | ND  | ND  | ND  | BF  | ND  | ND  | ND  | ND  | ND  | BF  | 0.0 | ND |
| <b>hsa-miR-185-3p</b>   | ND  | ND  | ND  | ND  | ND  | BF  | ND  | ND  | BF  | ND  | ND  | ND  | ND  | ND  | ND  | ND  | ND  | ND  | 0.0 | ND |
| <b>hsa-miR-16-1-3p</b>  | BF  | ND  | BF  | BF  | BF  | ND  | BF  | BF  | ND  | BF  | BF  | ND  | ND  | BF  | BF  | BF  | ND  | BF  | 0.0 | ND |
| <b>hsa-miR-129-2-3p</b> | ND  | ND  | ND  | ND  | ND  | BF  | ND  | ND  | ND  | ND  | ND  | ND  | ND  | ND  | ND  | ND  | ND  | ND  | 0.0 | ND |
| <b>hsa-miR-128</b>      | BF  | BF  | BF  | BF  | BF  | BF  | BF  | BF  | BF  | BF  | BF  | BF  | BF  | BF  | BF  | BF  | BF  | BF  | 0.0 | ND |
| <b>Total counts</b>     | 220 | 206 | 208 | 200 | 212 | 218 | 200 | 204 | 189 | 143 | 146 | 179 | 156 | 184 | 208 | 134 | 108 | 178 |     |    |
