# Supplementary material for: Mesenchymal stem cell-derived exosomes have altered microRNA profiles and induce osteogenic differentiation depending on the stage of differentiation
Source: PubMed Central journal article supplement (PMC5814093; doi:10.1371/journal.pone.0193059), 2018-02-15
Supplement: pone.0193059.s005.pdf [file pone.0193059.s005.pdf]

## Supplementary data

S2 Table. Top 50 expressed microRNAs based on mean of normalized dcq value

| microRNAs | groups | hMSC_P6         | hMSC_D3         | hMSC_D21        | Exo_P6          | Exo_D3          | Exo_D21         |
|-----------|--------|-----------------|-----------------|-----------------|-----------------|-----------------|-----------------|
|           |        | hsa-miR-125b-5p | hsa-miR-125b-5p | hsa-let-7a-5p   | hsa-miR-21-5p   | hsa-miR-21-5p   | hsa-miR-21-5p   |
|           |        | hsa-miR-21-5p   | hsa-miR-21-5p   | hsa-miR-125b-5p | hsa-miR-125b-5p | hsa-miR-125b-5p | hsa-miR-16-5p   |
|           |        | hsa-let-7a-5p   | hsa-let-7a-5p   | hsa-miR-21-5p   | hsa-miR-221-3p  | hsa-miR-16-5p   | hsa-miR-125b-5p |
|           |        | hsa-miR-221-3p  | hsa-miR-221-3p  | hsa-miR-221-3p  | hsa-miR-16-5p   | hsa-miR-221-3p  | hsa-miR-126-3p  |
|           |        | hsa-miR-16-5p   | hsa-miR-199a-3p | hsa-let-7b-5p   | hsa-let-7a-5p   | hsa-miR-23a-3p  | hsa-let-7a-5p   |
|           |        | hsa-miR-100-5p  | hsa-miR-16-5p   | hsa-miR-145-5p  | hsa-miR-23a-3p  | hsa-let-7a-5p   | hsa-miR-23a-3p  |
|           |        | hsa-miR-199a-3p | hsa-miR-23a-3p  | hsa-miR-23a-3p  | hsa-miR-100-5p  | hsa-miR-126-3p  | hsa-miR-221-3p  |
|           |        | hsa-miR-23a-3p  | hsa-miR-100-5p  | hsa-miR-24-3p   | hsa-miR-142-3p  | hsa-miR-451a    | hsa-miR-142-3p  |
|           |        | hsa-miR-31-5p   | hsa-miR-24-3p   | hsa-miR-199a-3p | hsa-miR-222-3p  | hsa-miR-100-5p  | hsa-miR-24-3p   |
|           |        | hsa-miR-222-3p  | hsa-let-7b-5p   | hsa-miR-125a-5p | hsa-miR-24-3p   | hsa-miR-142-3p  | hsa-miR-100-5p  |
|           |        | hsa-miR-24-3p   | hsa-miR-222-3p  | hsa-let-7i-5p   | hsa-miR-451a    | hsa-miR-222-3p  | hsa-miR-223-3p  |
|           |        | hsa-let-7i-5p   | hsa-let-7i-5p   | hsa-miR-100-5p  | hsa-miR-223-3p  | hsa-miR-24-3p   | hsa-miR-451a    |
|           |        | hsa-let-7b-5p   | hsa-miR-199a-5p | hsa-miR-16-5p   | hsa-miR-126-3p  | hsa-miR-223-3p  | hsa-miR-199a-3p |
|           |        | hsa-miR-29a-3p  | hsa-miR-125a-5p | hsa-let-7e-5p   | hsa-miR-199a-3p | hsa-miR-199a-3p | hsa-miR-26a-5p  |
|           |        | hsa-miR-34a-5p  | hsa-miR-31-5p   | hsa-miR-222-3p  | hsa-miR-92a-3p  | hsa-miR-92a-3p  | hsa-miR-27b-3p  |
|           |        | hsa-miR-26a-5p  | hsa-miR-34a-5p  | hsa-miR-26a-5p  | hsa-miR-31-5p   | hsa-miR-26a-5p  | hsa-miR-92a-3p  |
|           |        | hsa-miR-125a-5p | hsa-miR-26a-5p  | hsa-miR-214-3p  | hsa-miR-26a-5p  | hsa-miR-20a-5p  | hsa-miR-145-5p  |
|           |        | hsa-miR-103a-3p | hsa-miR-29a-3p  | hsa-let-7c      | hsa-miR-20a-5p  | hsa-miR-19b-3p  | hsa-miR-23b-3p  |
|           |        | hsa-miR-199a-5p | hsa-miR-103a-3p | hsa-miR-34a-5p  | hsa-miR-106a-5p | hsa-miR-27b-3p  | hsa-miR-222-3p  |
|           |        | hsa-let-7c      | hsa-miR-214-3p  | hsa-miR-103a-3p | hsa-miR-27b-3p  | hsa-miR-23b-3p  | hsa-miR-20a-5p  |
|           |        | hsa-miR-199b-5p | hsa-miR-22-3p   | hsa-miR-193b-3p | hsa-miR-23b-3p  | hsa-miR-145-5p  | hsa-let-7b-5p   |
|           |        | hsa-miR-15a-5p  | hsa-let-7c      | hsa-miR-23b-3p  | hsa-miR-103a-3p | hsa-miR-15a-5p  | hsa-miR-103a-3p |
|           |        | hsa-let-7e-5p   | hsa-let-7e-5p   | hsa-miR-199a-5p | hsa-miR-19b-3p  | hsa-miR-103a-3p | hsa-miR-106a-5p |
|           |        | hsa-let-7g-5p   | hsa-let-7g-5p   | hsa-miR-22-3p   | hsa-miR-145-5p  | hsa-miR-106a-5p | hsa-miR-125a-5p |
|           |        | hsa-miR-23b-3p  | hsa-miR-193b-3p | hsa-let-7g-5p   | hsa-let-7b-5p   | hsa-miR-31-5p   | hsa-miR-10b-5p  |
|           |        | hsa-miR-214-3p  | hsa-miR-199b-5p | hsa-miR-181a-5p | hsa-miR-93-5p   | hsa-let-7b-5p   | hsa-miR-152     |
|           |        | hsa-miR-22-3p   | hsa-miR-23b-3p  | hsa-miR-27b-3p  | hsa-miR-19a-3p  | hsa-miR-93-5p   | hsa-miR-181a-5p |
|           |        | hsa-miR-29c-3p  | hsa-miR-145-5p  | hsa-miR-127-3p  | hsa-miR-15a-5p  | hsa-miR-125a-5p | hsa-miR-150-5p  |
|           |        | hsa-miR-20a-5p  | hsa-miR-92a-3p  | hsa-miR-29a-3p  | hsa-let-7i-5p   | hsa-miR-29a-3p  | hsa-miR-93-5p   |
|           |        | hsa-miR-19b-3p  | hsa-miR-19b-3p  | hsa-miR-320a    | hsa-miR-29a-3p  | hsa-miR-19a-3p  | hsa-miR-15a-5p  |
|           |        | hsa-miR-92a-3p  | hsa-miR-15a-5p  | hsa-let-7d-5p   | hsa-miR-125a-5p | hsa-let-7g-5p   | hsa-let-7g-5p   |
|           |        | hsa-miR-27b-3p  | hsa-miR-27b-3p  | hsa-miR-92a-3p  | hsa-let-7g-5p   | hsa-let-7i-5p   | hsa-let-7e-5p   |
|           |        | hsa-miR-145-5p  | hsa-miR-20a-5p  | hsa-miR-31-5p   | hsa-miR-486-5p  | hsa-miR-181a-5p | hsa-miR-214-3p  |
|           |        | hsa-miR-193b-3p | hsa-miR-127-3p  | hsa-miR-423-3p  | hsa-miR-150-5p  | hsa-miR-10b-5p  | hsa-let-7i-5p   |
|           |        | hsa-miR-152     | hsa-miR-152     | hsa-miR-199b-5p | hsa-miR-152     | hsa-miR-150-5p  | hsa-miR-361-5p  |
|           |        | hsa-miR-127-3p  | hsa-miR-106a-5p | hsa-let-7f-5p   | hsa-miR-27a-3p  | hsa-miR-199b-5p | hsa-miR-486-5p  |
|           |        | hsa-miR-106a-5p | hsa-miR-29c-3p  | hsa-miR-143-3p  | hsa-miR-199b-5p | hsa-miR-152     | hsa-miR-151a-5p |
|           |        | hsa-miR-107     | hsa-miR-27a-3p  | hsa-miR-99b-5p  | hsa-let-7c      | hsa-miR-25-3p   | hsa-let-7c      |
|           |        | hsa-miR-423-3p  | hsa-miR-10b-5p  | hsa-miR-152     | hsa-miR-151a-5p | hsa-miR-486-5p  | hsa-miR-25-3p   |
|           |        | hsa-miR-181a-5p | hsa-miR-423-3p  | hsa-miR-107     | hsa-miR-10b-5p  | hsa-miR-27a-3p  | hsa-miR-19b-3p  |
|           |        | hsa-miR-29b-3p  | hsa-miR-320a    | hsa-miR-574-3p  | hsa-miR-181a-5p | hsa-let-7c      | hsa-miR-31-5p   |
|           |        | hsa-miR-320a    | hsa-miR-107     | hsa-miR-365a-3p | hsa-miR-25-3p   | hsa-miR-34a-5p  | hsa-miR-199b-5p |
|           |        | hsa-miR-151a-5p | hsa-let-7f-5p   | hsa-miR-27a-3p  | hsa-miR-214-3p  | hsa-miR-214-3p  | hsa-miR-30c-5p  |
|           |        | hsa-miR-93-5p   | hsa-miR-19a-3p  | hsa-miR-423-5p  | hsa-miR-30c-5p  | hsa-miR-320a    | hsa-miR-409-3p  |
|           |        | hsa-miR-19a-3p  | hsa-miR-365a-3p | hsa-miR-151a-5p | hsa-miR-320a    | hsa-let-7e-5p   | hsa-miR-191-5p  |
|           |        | hsa-miR-27a-3p  | hsa-miR-181a-5p | hsa-miR-197-3p  | hsa-miR-423-5p  | hsa-miR-122-5p  | hsa-miR-27a-3p  |
|           |        | hsa-let-7f-5p   | hsa-let-7d-5p   | hsa-miR-361-5p  | hsa-miR-122-5p  | hsa-miR-30c-5p  | hsa-miR-99a-5p  |
|           |        | hsa-miR-99b-5p  | hsa-miR-151a-5p | hsa-miR-191-5p  | hsa-miR-15b-5p  | hsa-miR-127-3p  | hsa-miR-127-3p  |
|           |        | hsa-miR-31-3p   | hsa-miR-361-5p  | hsa-miR-29c-3p  | hsa-miR-193b-3p | hsa-miR-99a-5p  | hsa-miR-320a    |
|           |        | hsa-miR-361-5p  | hsa-miR-136-5p  | hsa-miR-409-3p  | hsa-miR-30b-5p  | hsa-miR-106b-5p | hsa-miR-143-3p  |
