# Supplementary material for: Mesenchymal stem cell-derived exosomes have altered microRNA profiles and induce osteogenic differentiation depending on the stage of differentiation
Source: PubMed Central journal article supplement (PMC5814093; doi:10.1371/journal.pone.0193059), 2018-02-15
Supplement: pone.0193059.s006.pdf [file pone.0193059.s006.pdf]

Supplementary data

S3 Table. Correlation of top 50 expressed microRNAs among exosomes

| Comparison Groups                    | microRNAs       |
|--------------------------------------|-----------------|
| <b>Exo_p6 + Exo_D3 + Exo_D21 84%</b> | hsa-miR-21-5p   |
|                                      | hsa-miR-125b-5p |
|                                      | hsa-miR-221-3p  |
|                                      | hsa-miR-16-5p   |
|                                      | hsa-let-7a-5p   |
|                                      | hsa-miR-23a-3p  |
|                                      | hsa-miR-100-5p  |
|                                      | hsa-miR-142-3p  |
|                                      | hsa-miR-222-3p  |
|                                      | hsa-miR-24-3p   |
|                                      | hsa-miR-451a    |
|                                      | hsa-miR-223-3p  |
|                                      | hsa-miR-126-3p  |
|                                      | hsa-miR-199a-3p |
|                                      | hsa-miR-92a-3p  |
|                                      | hsa-miR-31-5p   |
|                                      | hsa-miR-26a-5p  |
|                                      | hsa-miR-20a-5p  |
|                                      | hsa-miR-106a-5p |
|                                      | hsa-miR-27b-3p  |
|                                      | hsa-miR-23b-3p  |
|                                      | hsa-miR-103a-3p |
|                                      | hsa-miR-19b-3p  |
|                                      | hsa-miR-145-5p  |
|                                      | hsa-let-7b-5p   |
|                                      | hsa-miR-93-5p   |
|                                      | hsa-miR-15a-5p  |
|                                      | hsa-let-7i-5p   |
|                                      | hsa-miR-125a-5p |
|                                      | hsa-let-7g-5p   |
|                                      | hsa-miR-486-5p  |
|                                      | hsa-miR-150-5p  |
| hsa-miR-152                          |                 |
| hsa-miR-27a-3p                       |                 |
| hsa-miR-199b-5p                      |                 |
| hsa-let-7c                           |                 |
| hsa-miR-10b-5p                       |                 |
| hsa-miR-181a-5p                      |                 |
| hsa-miR-25-3p                        |                 |
| hsa-miR-214-3p                       |                 |
| hsa-miR-30c-5p                       |                 |
| hsa-miR-320a                         |                 |
| <b>Exo_P6 + Exo_D3 6%</b>            | hsa-miR-19a-3p  |
|                                      | hsa-miR-29a-3p  |
|                                      | hsa-miR-122-5p  |
| <b>Exo_D3 + Exo_D21 6%</b>           | hsa-let-7e-5p   |
|                                      | hsa-miR-127-3p  |
|                                      | hsa-miR-99a-5p  |
| <b>Exo_P6 + Exo_D21 2%</b>           | hsa-miR-151a-5p |
| <b>Exo_P6 8%</b>                     | hsa-miR-423-5p  |
|                                      | hsa-miR-15b-5p  |
|                                      | hsa-miR-193b-3p |
|                                      | hsa-miR-30b-5p  |
| <b>Exo_D3 4%</b>                     | hsa-miR-34a-5p  |
|                                      | hsa-miR-106b-5p |
| <b>Exo_D21 8%</b>                    | hsa-miR-361-5p  |
|                                      | hsa-miR-409-3p  |
|                                      | hsa-miR-191-5p  |
|                                      | hsa-miR-143-3p  |
