# Supplementary material for: Mesenchymal stem cell-derived exosomes have altered microRNA profiles and induce osteogenic differentiation depending on the stage of differentiation
Source: PubMed Central journal article supplement (PMC5814093; doi:10.1371/journal.pone.0193059), 2018-02-15
Supplement: pone.0193059.s007.pdf [file pone.0193059.s007.pdf]

Supplementary data

S4 Table. Correlation of top 50 expressed microRNAs between exosomes and hMSCs

| Comparison                                         | Exo_P6 vs hMSC_P6                                         | Exo_D3 vs hMSC_D3 | Exo_D21 vs hMSC_D21 |            |
|----------------------------------------------------|-----------------------------------------------------------|-------------------|---------------------|------------|
| Top expressed microRNAs in both exosomes and hMSCs | hsa-miR-21-5p                                             | hsa-miR-21-5p     | hsa-miR-21-5p       |            |
|                                                    | hsa-miR-125b-5p                                           | hsa-miR-125b-5p   | hsa-miR-16-5p       |            |
|                                                    | hsa-miR-221-3p                                            | hsa-miR-16-5p     | hsa-miR-125b-5p     |            |
|                                                    | hsa-miR-16-5p                                             | hsa-miR-221-3p    | hsa-let-7a-5p       |            |
|                                                    | hsa-let-7a-5p                                             | hsa-miR-23a-3p    | hsa-miR-23a-3p      |            |
|                                                    | hsa-miR-23a-3p                                            | hsa-let-7a-5p     | hsa-miR-221-3p      |            |
|                                                    | hsa-miR-100-5p                                            | hsa-miR-100-5p    | hsa-miR-24-3p       |            |
|                                                    | hsa-miR-222-3p                                            | hsa-miR-222-3p    | hsa-miR-100-5p      |            |
|                                                    | hsa-miR-24-3p                                             | hsa-miR-24-3p     | hsa-miR-199a-3p     |            |
|                                                    | hsa-miR-199a-3p                                           | hsa-miR-199a-3p   | hsa-miR-26a-5p      |            |
|                                                    | hsa-miR-92a-3p                                            | hsa-miR-92a-3p    | hsa-miR-27b-3p      |            |
|                                                    | hsa-miR-31-5p                                             | hsa-miR-26a-5p    | hsa-miR-92a-3p      |            |
|                                                    | hsa-miR-26a-5p                                            | hsa-miR-20a-5p    | hsa-miR-145-5p      |            |
|                                                    | hsa-miR-20a-5p                                            | hsa-miR-19b-3p    | hsa-miR-23b-3p      |            |
|                                                    | hsa-miR-106a-5p                                           | hsa-miR-27b-3p    | hsa-miR-222-3p      |            |
|                                                    | hsa-miR-27b-3p                                            | hsa-miR-23b-3p    | hsa-let-7b-5p       |            |
|                                                    | hsa-miR-23b-3p                                            | hsa-miR-145-5p    | hsa-miR-103a-3p     |            |
|                                                    | hsa-miR-103a-3p                                           | hsa-miR-15a-5p    | hsa-miR-125a-5p     |            |
|                                                    | hsa-miR-19b-3p                                            | hsa-miR-103a-3p   | hsa-miR-152         |            |
|                                                    | hsa-miR-145-5p                                            | hsa-miR-106a-5p   | hsa-miR-181a-5p     |            |
|                                                    | hsa-let-7b-5p                                             | hsa-miR-31-5p     | hsa-let-7g-5p       |            |
|                                                    | hsa-miR-93-5p                                             | hsa-let-7b-5p     | hsa-let-7e-5p       |            |
|                                                    | hsa-miR-19a-3p                                            | hsa-miR-93-5p     | hsa-miR-214-3p      |            |
|                                                    | hsa-miR-15a-5p                                            | hsa-miR-125a-5p   | hsa-let-7i-5p       |            |
|                                                    | hsa-let-7i-5p                                             | hsa-miR-29a-3p    | hsa-miR-361-5p      |            |
|                                                    | hsa-miR-29a-3p                                            | hsa-miR-19a-3p    | hsa-miR-151a-5p     |            |
|                                                    | hsa-miR-125a-5p                                           | hsa-let-7g-5p     | hsa-let-7c          |            |
|                                                    | hsa-let-7g-5p                                             | hsa-let-7i-5p     | hsa-miR-31-5p       |            |
|                                                    | hsa-miR-152                                               | hsa-miR-181a-5p   | hsa-miR-199b-5p     |            |
|                                                    | hsa-miR-27a-3p                                            | hsa-miR-10b-5p    | hsa-miR-409-3p      |            |
|                                                    | hsa-miR-199b-5p                                           | hsa-miR-199b-5p   | hsa-miR-191-5p      |            |
|                                                    | hsa-let-7c                                                | hsa-miR-152       | hsa-miR-27a-3p      |            |
|                                                    | hsa-miR-151a-5p                                           | hsa-miR-27a-3p    | hsa-miR-127-3p      |            |
|                                                    | hsa-miR-10b-5p                                            | hsa-let-7c        | hsa-miR-320a        |            |
|                                                    | hsa-miR-181a-5p                                           | hsa-miR-34a-5p    | hsa-miR-143-3p      |            |
|                                                    | hsa-miR-214-3p                                            | hsa-miR-214-3p    |                     |            |
|                                                    | hsa-miR-320a                                              | hsa-miR-320a      |                     |            |
|                                                    | hsa-miR-193b-3p                                           | hsa-let-7e-5p     |                     |            |
|                                                    |                                                           | hsa-miR-127-3p    |                     |            |
|                                                    | <b>Percentage of microRNAs in both exosomes and hMSCs</b> | <b>74%</b>        | <b>76%</b>          | <b>70%</b> |

S4 Table cont. Correlation of top 50 expressed microRNAs between exosomes and hMSCs

|                                                 | Exosomes | Exo_P6         | Exo_D3          | Exo_D21         |
|-------------------------------------------------|----------|----------------|-----------------|-----------------|
| <b>Top expressed microRNAs only in exosomes</b> |          |                |                 |                 |
|                                                 |          | hsa-miR-142-3p | hsa-miR-126-3p  | hsa-miR-126-3p  |
|                                                 |          | hsa-miR-451a   | hsa-miR-451a    | hsa-miR-142-3p  |
|                                                 |          | hsa-miR-223-3p | hsa-miR-142-3p  | hsa-miR-223-3p  |
|                                                 |          | hsa-miR-126-3p | hsa-miR-223-3p  | hsa-miR-451a    |
|                                                 |          | hsa-miR-486-5p | hsa.-miR-93-5p  | hsa-miR-20a-5p  |
|                                                 |          | hsa-miR-150-5p | hsa-miR-150-5p  | hsa-miR-106a-5p |
|                                                 |          | hsa-miR-10b-5p | hsa-miR-25-3p   | hsa-miR-10b-5p  |
|                                                 |          | hsa-miR-25-3p  | hsa-miR-486-5p  | hsa-miR-150-5p  |
|                                                 |          | hsa-miR-30c-5p | hsa-miR-122-5p  | hsa.-miR-93-5p  |
|                                                 |          | hsa-miR-423-5p | hsa-miR-30c-5p  | hsa.-miR-15a-5p |
|                                                 |          | hsa-miR-122-5p | hsa-miR-99a-5p  | hsa-miR-486-5p  |
|                                                 |          | hsa-miR-15b-5p | hsa-miR-106b-5p | hsa-miR-25-3p   |
|                                                 |          | hsa-miR-30b-5p |                 | hsa.-miR-19b-3p |
|                                                 |          |                |                 | hsa-miR-30c-5p  |
|                                                 |          |                |                 | hsa-miR-99a-5p  |
