# Supplementary material for: Mesenchymal stem cell-derived exosomes have altered microRNA profiles and induce osteogenic differentiation depending on the stage of differentiation
Source: PubMed Central journal article supplement (PMC5814093; doi:10.1371/journal.pone.0193059), 2018-02-15
Supplement: pone.0193059.s008.pdf [file pone.0193059.s008.pdf]

## Supplementary data

S5 Table. Biological pathways enriched by differentially expressed microRNAs in Exo\_D3 vs Exo\_P6

| KEGG pathway                                                                       | p-value,<br>FDR corrected | genes | miRNAs | algorithms |
|------------------------------------------------------------------------------------|---------------------------|-------|--------|------------|
| Hippo signaling pathway (hsa04390)                                                 | 1.41E-05                  | 9     | 1      | microT-CDS |
| Glycosphingolipid biosynthesis - lacto and neolacto series (hsa00601)              | 6.59E-03                  | 2     | 1      | microT-CDS |
| Adherens junction (hsa04520)                                                       | 6.59E-03                  | 6     | 1      | microT-CDS |
| Fatty acid biosynthesis (hsa00061)                                                 | 1.23E-17                  | 1     | 1      | Tarbase    |
| Fatty acid metabolism (hsa01212)                                                   | 1.39E-06                  | 4     | 1      | Tarbase    |
| ECM-receptor interaction (hsa04512)                                                | 5.63E-05                  | 11    | 1      | Tarbase    |
| Adherens junction (hsa04520)                                                       | 3.98E-04                  | 15    | 1      | Tarbase    |
| Lysine degradation (hsa00310)                                                      | 7.56E-04                  | 11    | 1      | Tarbase    |
| Glycosaminoglycan biosynthesis - chondroitin sulfate / dermatan sulfate (hsa00532) | 2.58E-03                  | 4     | 1      | Tarbase    |
| Steroid biosynthesis (hsa00100)                                                    | 4.44E-03                  | 4     | 1      | Tarbase    |
| 2-Oxocarboxylic acid metabolism (hsa01210)                                         | 9.67E-03                  | 4     | 1      | Tarbase    |
| Biosynthesis of amino acids (hsa01230)                                             | 9.67E-03                  | 14    | 1      | Tarbase    |
| Ribosome (hsa03010)                                                                | 9.67E-03                  | 26    | 1      | Tarbase    |
| Bacterial invasion of epithelial cells (hsa05100)                                  | 9.67E-03                  | 15    | 1      | Tarbase    |
| Pathogenic Escherichia coli infection (hsa05130)                                   | 9.67E-03                  | 14    | 1      | Tarbase    |
| Central carbon metabolism in cancer (hsa05230)                                     | 1.52E-02                  | 10    | 1      | Tarbase    |
| Fatty acid elongation (hsa00062)                                                   | 1.53E-02                  | 2     | 1      | Tarbase    |
| Cell cycle (hsa04110)                                                              | 2.85E-02                  | 22    | 1      | Tarbase    |
| Proteoglycans in cancer (hsa05205)                                                 | 3.47E-02                  | 27    | 1      | Tarbase    |
| Spliceosome (hsa03040)                                                             | 4.21E-02                  | 22    | 1      | Tarbase    |
| Hippo signaling pathway (hsa04390)                                                 | 4.21E-02                  | 16    | 1      | Tarbase    |
