# Supplementary material for: Mesenchymal stem cell-derived exosomes have altered microRNA profiles and induce osteogenic differentiation depending on the stage of differentiation
Source: PubMed Central journal article supplement (PMC5814093; doi:10.1371/journal.pone.0193059), 2018-02-15
Supplement: pone.0193059.s009.pdf [file pone.0193059.s009.pdf]

## Supplementary data

S6 Table. Biological pathways enriched by differentially expressed microRNAs in Exo\_D21 vs Exo\_P6

| KEGG pathway                                                        | p-value,<br>FDR corrected | genes | miRNAs | algorithms |
|---------------------------------------------------------------------|---------------------------|-------|--------|------------|
| ECM-receptor interaction (hsa04512)                                 | 8.84E-63                  | 40    | 8      | microT-CDS |
| Prion diseases (hsa05020)                                           | 1.64E-09                  | 5     | 5      | microT-CDS |
| Amoebiasis (hsa05146)                                               | 4.30E-09                  | 43    | 9      | microT-CDS |
| Proteoglycans in cancer (hsa05205)                                  | 1.66E-08                  | 66    | 9      | microT-CDS |
| Glioma (hsa05214)                                                   | 3.86E-07                  | 28    | 8      | microT-CDS |
| Focal adhesion (hsa04510)                                           | 7.16E-07                  | 79    | 9      | microT-CDS |
| Renal cell carcinoma (hsa05211)                                     | 2.31E-05                  | 30    | 8      | microT-CDS |
| ErbB signaling pathway (hsa04012)                                   | 2.12E-04                  | 36    | 9      | microT-CDS |
| PI3K-Akt signaling pathway (hsa04151)                               | 2.12E-04                  | 104   | 9      | microT-CDS |
| Choline metabolism in cancer (hsa05231)                             | 2.70E-04                  | 40    | 8      | microT-CDS |
| Non-small cell lung cancer (hsa05223)                               | 2.75E-04                  | 24    | 8      | microT-CDS |
| Lysine degradation (hsa00310)                                       | 8.02E-04                  | 16    | 7      | microT-CDS |
| Estrogen signaling pathway (hsa04915)                               | 1.30E-03                  | 32    | 9      | microT-CDS |
| Ras signaling pathway (hsa04014)                                    | 2.27E-03                  | 65    | 9      | microT-CDS |
| Signaling pathways regulating pluripotency of stem cells (hsa04550) | 2.66E-03                  | 46    | 9      | microT-CDS |
| Platelet activation (hsa04611)                                      | 3.78E-03                  | 41    | 9      | microT-CDS |
| Rap1 signaling pathway (hsa04015)                                   | 4.48E-03                  | 65    | 9      | microT-CDS |
| FoxO signaling pathway (hsa04068)                                   | 1.49E-02                  | 44    | 8      | microT-CDS |
| Morphine addiction (hsa05032)                                       | 1.49E-02                  | 30    | 9      | microT-CDS |
| Protein digestion and absorption (hsa04974)                         | 1.51E-02                  | 32    | 8      | microT-CDS |
| Small cell lung cancer (hsa05222)                                   | 1.63E-02                  | 31    | 9      | microT-CDS |
| Neurotrophin signaling pathway (hsa04722)                           | 1.68E-02                  | 41    | 9      | microT-CDS |
| MAPK signaling pathway                                              | 1.85E-02                  | 74    | 9      | microT-CDS |
| Thyroid hormone signaling pathway (hsa04010)                        | 1.90E-02                  | 35    | 7      | microT-CDS |
| Wnt signaling pathway (hsa04310)                                    | 2.23E-02                  | 41    | 9      | microT-CDS |
| Glycosaminoglycan biosynthesis - keratan sulfate (hsa00533)         | 2.58E-02                  | 5     | 4      | microT-CDS |
| Amphetamine addiction (hsa05031)                                    | 2.58E-02                  | 23    | 8      | microT-CDS |
| mTOR signaling pathway (hsa04150)                                   | 2.65E-02                  | 23    | 7      | microT-CDS |
| Gap junction (hsa04540)                                             | 2.65E-02                  | 29    | 8      | microT-CDS |
| T cell receptor signaling pathway (hsa04660)                        | 3.12E-02                  | 34    | 9      | microT-CDS |
| Endometrial cancer (hsa05213)                                       | 3.19E-02                  | 20    | 7      | microT-CDS |
| Aldosterone-regulated sodium reabsorption (hsa04960)                | 3.23E-02                  | 16    | 6      | microT-CDS |
| Transcriptional misregulation in cancer (hsa05202)                  | 3.67E-02                  | 52    | 9      | microT-CDS |
| Regulation of actin cytoskeleton (hsa04810)                         | 3.92E-02                  | 65    | 9      | microT-CDS |
| Dorso-ventral axis formation (hsa04320)                             | 4.14E-02                  | 12    | 6      | microT-CDS |
| cAMP signaling pathway (hsa04024)                                   | 4.14E-02                  | 58    | 9      | microT-CDS |

## Supplementary data

S6 Table cont. Biological pathways enriched by differentially expressed microRNAs in Exo\_D21 vs Exo\_P6

| KEGG pathway                                                        | p-value,<br>FDR corrected | genes | miRNAs | algorithms |
|---------------------------------------------------------------------|---------------------------|-------|--------|------------|
| Hippo signaling pathway (hsa04390)                                  | 4.14E-02                  | 37    | 9      | microT-CDS |
| Cholinergic synapse (hsa04725)                                      | 4.14E-02                  | 34    | 9      | microT-CDS |
| Fc epsilon RI signaling pathway (hsa04664)                          | 4.47E-02                  | 25    | 7      | microT-CDS |
| Prostate cancer (hsa05215)                                          | 4.58E-02                  | 29    | 8      | microT-CDS |
| Sphingolipid signaling pathway (hsa04071)                           | 4.90E-02                  | 33    | 8      | microT-CDS |
| Proteoglycans in cancer (hsa05205)                                  | 1.22E-17                  | 112   | 9      | Tarbase    |
| Viral carcinogenesis (hsa05203)                                     | 2.40E-12                  | 110   | 9      | Tarbase    |
| Chronic myeloid leukemia (hsa05220)                                 | 5.32E-10                  | 52    | 9      | Tarbase    |
| Hepatitis B (hsa05161)                                              | 1.16E-09                  | 81    | 9      | Tarbase    |
| Protein processing in endoplasmic reticulum (hsa04141)              | 4.76E-08                  | 94    | 9      | Tarbase    |
| Pancreatic cancer (hsa05212)                                        | 1.10E-07                  | 44    | 9      | Tarbase    |
| Hippo signaling pathway (hsa04390)                                  | 1.35E-07                  | 74    | 8      | Tarbase    |
| TGF-beta signaling pathway (hsa04350)                               | 1.35E-07                  | 45    | 9      | Tarbase    |
| Adherens junction (hsa04520)                                        | 3.29E-07                  | 45    | 9      | Tarbase    |
| Glioma (hsa05214)                                                   | 4.33E-07                  | 40    | 9      | Tarbase    |
| Colorectal cancer (hsa05210)                                        | 6.46E-07                  | 42    | 9      | Tarbase    |
| ECM-receptor interaction (mmu04512)                                 | 8.27E-07                  | 36    | 9      | Tarbase    |
| Prion diseases (hsa05020)                                           | 2.04E-06                  | 12    | 8      | Tarbase    |
| Cell cycle (hsa04110)                                               | 4.52E-06                  | 69    | 9      | Tarbase    |
| Non-small cell lung cancer (hsa05223)                               | 1.11E-05                  | 34    | 9      | Tarbase    |
| Signaling pathways regulating pluripotency of stem cells (hsa04550) | 1.38E-05                  | 73    | 9      | Tarbase    |
| Estrogen signaling pathway (hsa04915)                               | 1.38E-05                  | 54    | 9      | Tarbase    |
| Renal cell carcinoma (hsa05211)                                     | 1.53E-05                  | 42    | 8      | Tarbase    |
| Focal adhesion (mmu04510)                                           | 1.53E-05                  | 110   | 9      | Tarbase    |
| Ubiquitin mediated proteolysis (hsa04120)                           | 2.06E-05                  | 79    | 9      | Tarbase    |
| Thyroid hormone signaling pathway (hsa04919)                        | 2.06E-05                  | 67    | 9      | Tarbase    |
| Bacterial invasion of epithelial cells (hsa05100)                   | 3.17E-05                  | 45    | 9      | Tarbase    |
| Central carbon metabolism in cancer (hsa05230)                      | 3.78E-05                  | 39    | 9      | Tarbase    |
| Oocyte meiosis (hsa04114)                                           | 9.23E-05                  | 57    | 9      | Tarbase    |
| Neurotrophin signaling pathway (hsa04722)                           | 9.88E-05                  | 66    | 9      | Tarbase    |
| Fatty acid biosynthesis (hsa00061)                                  | 1.18E-04                  | 4     | 7      | Tarbase    |
| Sphingolipid signaling pathway (hsa04071)                           | 1.46E-04                  | 61    | 9      | Tarbase    |
| Pathways in cancer (hsa05200)                                       | 1.55E-04                  | 184   | 9      | Tarbase    |
| mTOR signaling pathway (hsa04150)                                   | 1.90E-04                  | 38    | 9      | Tarbase    |
| Endometrial cancer (hsa05213)                                       | 1.90E-04                  | 32    | 9      | Tarbase    |
| FoxO signaling pathway (hsa04068)                                   | 2.37E-04                  | 74    | 9      | Tarbase    |

## Supplementary data

S6 Table cont. Biological pathways enriched by differentially expressed microRNAs in Exo\_D21 vs Exo\_P6

| KEGG pathway                                                          | p-value,<br>FDR corrected | genes | miRNAs | algorithms |
|-----------------------------------------------------------------------|---------------------------|-------|--------|------------|
| Epstein-Barr virus infection (hsa05169)                               | 2.37E-04                  | 101   | 9      | Tarbase    |
| Progesterone-mediated oocyte maturation (hsa04914)                    | 2.52E-04                  | 51    | 9      | Tarbase    |
| Prolactin signaling pathway (hsa04917)                                | 2.69E-04                  | 39    | 8      | Tarbase    |
| HTLV-I infection (hsa05166)                                           | 2.71E-04                  | 126   | 9      | Tarbase    |
| p53 signaling pathway (hsa04115)                                      | 3.53E-04                  | 41    | 9      | Tarbase    |
| ErbB signaling pathway (hsa04012)                                     | 5.63E-04                  | 48    | 9      | Tarbase    |
| Small cell lung cancer (hsa05222)                                     | 8.86E-04                  | 48    | 9      | Tarbase    |
| Prostate cancer (hsa05215)                                            | 1.10E-03                  | 50    | 9      | Tarbase    |
| Bladder cancer (hsa05219)                                             | 1.53E-03                  | 25    | 9      | Tarbase    |
| TNF signaling pathway (hsa04668)                                      | 2.05E-03                  | 55    | 9      | Tarbase    |
| HIF-1 signaling pathway (hsa04066)                                    | 3.13E-03                  | 56    | 9      | Tarbase    |
| Lysine degradation (hsa00310)                                         | 3.59E-03                  | 24    | 8      | Tarbase    |
| Steroid biosynthesis (hsa00100)                                       | 4.53E-03                  | 11    | 8      | Tarbase    |
| Melanoma (hsa05218)                                                   | 5.43E-03                  | 36    | 9      | Tarbase    |
| AMPK signaling pathway (hsa04152)                                     | 5.94E-03                  | 62    | 9      | Tarbase    |
| Shigellosis (hsa05131)                                                | 6.06E-03                  | 34    | 8      | Tarbase    |
| Wnt signaling pathway (hsa04310)                                      | 8.51E-03                  | 66    | 9      | Tarbase    |
| Gap junction (hsa04540)                                               | 1.05E-02                  | 43    | 9      | Tarbase    |
| Epithelial cell signaling in Helicobacter pylori infection (hsa05120) | 1.44E-02                  | 36    | 9      | Tarbase    |
| Platelet activation (hsa04611)                                        | 1.70E-02                  | 61    | 9      | Tarbase    |
| Acute myeloid leukemia (hsa05221)                                     | 1.76E-02                  | 31    | 8      | Tarbase    |
| Thyroid cancer (hsa05216)                                             | 1.78E-02                  | 17    | 8      | Tarbase    |
| Sulfur metabolism (hsa00920)                                          | 2.26E-02                  | 5     | 5      | Tarbase    |
| Insulin signaling pathway (hsa04910)                                  | 2.29E-02                  | 67    | 9      | Tarbase    |
| Endocytosis (hsa04144)                                                | 2.69E-02                  | 96    | 9      | Tarbase    |
| VEGF signaling pathway (hsa04370)                                     | 3.66E-02                  | 32    | 9      | Tarbase    |
| Glycosaminoglycan biosynthesis - keratan sulfate (hsa00533)           | 3.79E-02                  | 7     | 7      | Tarbase    |
| mRNA surveillance pathway (hsa03015)                                  | 3.95E-02                  | 47    | 9      | Tarbase    |
| Circadian rhythm (hsa04710)                                           | 3.95E-02                  | 18    | 9      | Tarbase    |
| Pathogenic Escherichia coli infection (hsa05130)                      | 4.42E-02                  | 29    | 9      | Tarbase    |
| Chagas disease (American trypanosomiasis) (hsa05142)                  | 4.42E-02                  | 49    | 9      | Tarbase    |
| Transcriptional misregulation in cancer (hsa05202)                    | 4.45E-02                  | 73    | 9      | Tarbase    |
| Apoptosis (hsa04210)                                                  | 4.84E-02                  | 43    | 9      | Tarbase    |
| Leukocyte transendothelial migration (hsa04670)                       | 4.95E-02                  | 54    | 9      | Tarbase    |
