# Supplementary material for: Mesenchymal stem cell-derived exosomes have altered microRNA profiles and induce osteogenic differentiation depending on the stage of differentiation
Source: PubMed Central journal article supplement (PMC5814093; doi:10.1371/journal.pone.0193059), 2018-02-15
Supplement: pone.0193059.s010.pdf [file pone.0193059.s010.pdf]

## Supplementary data

S7 Table. Biological pathways enriched by differentially expressed microRNAs in Exo\_D21 vs Exo\_D3

| KEGG pathway                                                        | p-value,<br>FDR corrected | genes | miRNAs | algorithms |
|---------------------------------------------------------------------|---------------------------|-------|--------|------------|
| ECM-receptor interaction (hsa04512)                                 | 7.57E-35                  | 44    | 14     | microT-CDS |
| Fatty acid biosynthesis (hsa00061)                                  | 6.58E-15                  | 8     | 6      | microT-CDS |
| Proteoglycans in cancer (hsa05205)                                  | 6.58E-15                  | 104   | 15     | microT-CDS |
| Signaling pathways regulating pluripotency of stem cells (hsa04550) | 4.86E-10                  | 75    | 16     | microT-CDS |
| Hippo signaling pathway (hsa04390)                                  | 1.11E-08                  | 73    | 15     | microT-CDS |
| Focal adhesion (hsa04510)                                           | 4.67E-08                  | 107   | 17     | microT-CDS |
| Pathways in cancer (hsa05200)                                       | 1.23E-07                  | 173   | 16     | microT-CDS |
| Glioma (hsa05214)                                                   | 1.68E-07                  | 36    | 15     | microT-CDS |
| PI3K-Akt signaling pathway (hsa04151)                               | 1.68E-07                  | 155   | 16     | microT-CDS |
| Prion diseases (hsa05020)                                           | 1.73E-07                  | 10    | 9      | microT-CDS |
| Ras signaling pathway (hsa04014)                                    | 2.74E-07                  | 104   | 16     | microT-CDS |
| Renal cell carcinoma (hsa05211)                                     | 2.78E-07                  | 41    | 14     | microT-CDS |
| Wnt signaling pathway (hsa04310)                                    | 4.85E-06                  | 68    | 15     | microT-CDS |
| Thyroid hormone signaling pathway (hsa04919)                        | 8.14E-06                  | 58    | 14     | microT-CDS |
| TGF-beta signaling pathway (hsa04350)                               | 1.67E-05                  | 42    | 12     | microT-CDS |
| Colorectal cancer (hsa05210)                                        | 1.67E-05                  | 36    | 13     | microT-CDS |
| mTOR signaling pathway (hsa04150)                                   | 1.67E-05                  | 37    | 15     | microT-CDS |
| MAPK signaling pathway (hsa04010)                                   | 1.67E-05                  | 118   | 16     | microT-CDS |
| Prostate cancer (hsa05215)                                          | 2.07E-05                  | 48    | 15     | microT-CDS |
| Melanoma (hsa05218)                                                 | 3.23E-05                  | 41    | 15     | microT-CDS |
| FoxO signaling pathway (hsa04068)                                   | 3.23E-05                  | 67    | 16     | microT-CDS |
| Adrenergic signaling in cardiomyocytes (hsa04261)                   | 4.23E-05                  | 61    | 14     | microT-CDS |
| Choline metabolism in cancer (hsa05231)                             | 1.26E-04                  | 51    | 14     | microT-CDS |
| AMPK signaling pathway (hsa04152)                                   | 1.31E-04                  | 62    | 15     | microT-CDS |
| Amoebiasis (hsa05146)                                               | 1.73E-04                  | 46    | 13     | microT-CDS |
| Rap1 signaling pathway (hsa04015)                                   | 2.06E-04                  | 94    | 15     | microT-CDS |
| Non-small cell lung cancer (hsa05223)                               | 2.06E-04                  | 29    | 14     | microT-CDS |
| Lysine degradation (hsa00310)                                       | 2.83E-04                  | 21    | 10     | microT-CDS |
| Prolactin signaling pathway (hsa04917)                              | 4.40E-04                  | 35    | 14     | microT-CDS |
| Pancreatic cancer (hsa05212)                                        | 7.09E-04                  | 34    | 14     | microT-CDS |
| cAMP signaling pathway (hsa04024)                                   | 7.09E-04                  | 88    | 15     | microT-CDS |
| Neurotrophin signaling pathway (hsa04722)                           | 7.09E-04                  | 59    | 16     | microT-CDS |
| Axon guidance (hsa04360)                                            | 8.41E-04                  | 57    | 15     | microT-CDS |
| Estrogen signaling pathway (hsa04915)                               | 1.06E-03                  | 43    | 15     | microT-CDS |
| Small cell lung cancer (hsa05222)                                   | 1.11E-03                  | 43    | 14     | microT-CDS |
| Mucin type O-Glycan biosynthesis (hsa00512)                         | 1.63E-03                  | 13    | 10     | microT-CDS |

## Supplementary data

S7 Table cont. Biological pathways enriched by differentially expressed microRNAs in Exo\_D21 vs Exo\_D3

| KEGG pathway                                                          | p-value,<br>FDR corrected | genes | miRNAs | algorithms |
|-----------------------------------------------------------------------|---------------------------|-------|--------|------------|
| Long-term depression (hsa04730)                                       | 1.65E-03                  | 32    | 13     | microT-CDS |
| ErbB signaling pathway (hsa04012)                                     | 1.65E-03                  | 44    | 14     | microT-CDS |
| Glutamatergic synapse (hsa04724)                                      | 2.75E-03                  | 50    | 13     | microT-CDS |
| Glycosaminoglycan biosynthesis - heparan sulfate / heparin (hsa00534) | 3.60E-03                  | 12    | 8      | microT-CDS |
| T cell receptor signaling pathway (hsa04660)                          | 4.06E-03                  | 49    | 14     | microT-CDS |
| Platelet activation (hsa04611)                                        | 4.25E-03                  | 55    | 15     | microT-CDS |
| Regulation of actin cytoskeleton (hsa04810)                           | 5.08E-03                  | 93    | 17     | microT-CDS |
| Endometrial cancer (hsa05213)                                         | 7.10E-03                  | 28    | 12     | microT-CDS |
| Long-term potentiation (hsa04720)                                     | 1.00E-02                  | 33    | 13     | microT-CDS |
| Acute myeloid leukemia (hsa05221)                                     | 1.36E-02                  | 28    | 12     | microT-CDS |
| Dorso-ventral axis formation (hsa04320)                               | 1.46E-02                  | 16    | 10     | microT-CDS |
| Sphingolipid signaling pathway (hsa04071)                             | 2.08E-02                  | 51    | 13     | microT-CDS |
| Dopaminergic synapse (hsa04728)                                       | 2.22E-02                  | 57    | 14     | microT-CDS |
| Fc epsilon RI signaling pathway (hsa04664)                            | 2.47E-02                  | 34    | 13     | microT-CDS |
| Endocrine and other factor-regulated calcium reabsorption (hsa04961)  | 2.55E-02                  | 23    | 12     | microT-CDS |
| Fc gamma R-mediated phagocytosis (hsa04666)                           | 2.74E-02                  | 41    | 13     | microT-CDS |
| Insulin signaling pathway (hsa04910)                                  | 2.83E-02                  | 59    | 15     | microT-CDS |
| Amphetamine addiction (hsa05031)                                      | 2.89E-02                  | 29    | 12     | microT-CDS |
| p53 signaling pathway (hsa04115)                                      | 2.92E-02                  | 32    | 12     | microT-CDS |
| Protein digestion and absorption (hsa04974)                           | 2.92E-02                  | 40    | 12     | microT-CDS |
| cGMP-PKG signaling pathway (hsa04022)                                 | 2.92E-02                  | 68    | 16     | microT-CDS |
| Alanine, aspartate and glutamate metabolism (hsa00250)                | 2.96E-02                  | 17    | 10     | microT-CDS |
| Oxytocin signaling pathway (hsa04921)                                 | 3.17E-02                  | 65    | 15     | microT-CDS |
| Thyroid cancer (hsa05216)                                             | 3.34E-02                  | 13    | 7      | microT-CDS |
| Aldosterone-regulated sodium reabsorption (hsa04960)                  | 3.34E-02                  | 20    | 14     | microT-CDS |
| Gap junction (hsa04540)                                               | 3.52E-02                  | 36    | 13     | microT-CDS |
| Viral carcinogenesis (hsa05203)                                       | 4.39E-02                  | 67    | 14     | microT-CDS |
| MicroRNAs in cancer (rno05206)                                        | 1.38E-90                  | 132   | 15     | Tarbase    |
| Proteoglycans in cancer (rno05205)                                    | 2.05E-23                  | 139   | 14     | Tarbase    |
| Hepatitis B (rno05161)                                                | 3.17E-11                  | 95    | 14     | Tarbase    |
| Prostate cancer (rno05215)                                            | 1.24E-10                  | 71    | 14     | Tarbase    |
| Glioma (rno05214)                                                     | 1.43E-10                  | 49    | 14     | Tarbase    |
| Chronic myeloid leukemia (rno05220)                                   | 1.04E-09                  | 61    | 13     | Tarbase    |
| Renal cell carcinoma (hsa05211)                                       | 1.34E-09                  | 54    | 13     | Tarbase    |
| Protein processing in endoplasmic reticulum (hsa04141)                | 6.56E-08                  | 110   | 15     | Tarbase    |
| Fatty acid metabolism (hsa01212)                                      | 7.86E-08                  | 30    | 13     | Tarbase    |

## Supplementary data

S7 Table cont. Biological pathways enriched by differentially expressed microRNAs in Exo\_D21 vs Exo\_D3

| KEGG pathway                                                        | p-value,<br>FDR corrected | genes | miRNAs | algorithms |
|---------------------------------------------------------------------|---------------------------|-------|--------|------------|
| Cell cycle (rno04110)                                               | 7.86E-08                  | 86    | 14     | Tarbase    |
| Hippo signaling pathway (rno04390)                                  | 7.86E-08                  | 88    | 14     | Tarbase    |
| ECM-receptor interaction (mmu04512)                                 | 8.26E-08                  | 47    | 15     | Tarbase    |
| Pancreatic cancer (mo05212)                                         | 9.15E-08                  | 50    | 13     | Tarbase    |
| Pathways in cancer (rno05200)                                       | 9.15E-08                  | 231   | 15     | Tarbase    |
| TGF-beta signaling pathway (hsa04350)                               | 1.05E-07                  | 53    | 14     | Tarbase    |
| Bacterial invasion of epithelial cells (hsa05100)                   | 1.36E-07                  | 55    | 14     | Tarbase    |
| Non-small cell lung cancer (rno05223)                               | 4.38E-07                  | 41    | 13     | Tarbase    |
| Bladder cancer (mo05219)                                            | 5.46E-07                  | 32    | 13     | Tarbase    |
| Small cell lung cancer (rno05222)                                   | 5.46E-07                  | 62    | 15     | Tarbase    |
| FoxO signaling pathway (rno04068)                                   | 5.86E-07                  | 92    | 14     | Tarbase    |
| Adherens junction (hsa04520)                                        | 7.00E-07                  | 52    | 14     | Tarbase    |
| Lysine degradation (hsa00310)                                       | 1.04E-06                  | 33    | 12     | Tarbase    |
| p53 signaling pathway (rno04115)                                    | 1.33E-06                  | 53    | 14     | Tarbase    |
| Viral carcinogenesis (mo05203)                                      | 2.01E-06                  | 123   | 14     | Tarbase    |
| Endometrial cancer (rno05213)                                       | 2.24E-06                  | 40    | 14     | Tarbase    |
| Prion diseases (hsa05020)                                           | 3.33E-06                  | 17    | 12     | Tarbase    |
| Focal adhesion (rno04510)                                           | 3.94E-06                  | 130   | 15     | Tarbase    |
| Thyroid hormone signaling pathway (rno04919)                        | 5.09E-06                  | 75    | 14     | Tarbase    |
| Colorectal cancer (mo05210)                                         | 5.80E-06                  | 47    | 14     | Tarbase    |
| TNF signaling pathway (hsa04668)                                    | 1.08E-05                  | 73    | 15     | Tarbase    |
| Melanoma (mo05218)                                                  | 1.44E-05                  | 48    | 14     | Tarbase    |
| Central carbon metabolism in cancer (rno05230)                      | 2.07E-05                  | 47    | 14     | Tarbase    |
| Glycosaminoglycan biosynthesis - keratan sulfate (hsa00533)         | 2.11E-05                  | 11    | 8      | Tarbase    |
| Other types of O-glycan biosynthesis (hsa00514)                     | 2.11E-05                  | 17    | 11     | Tarbase    |
| Fatty acid degradation (hsa00071)                                   | 3.29E-05                  | 25    | 13     | Tarbase    |
| Signaling pathways regulating pluripotency of stem cells (hsa04550) | 3.29E-05                  | 86    | 15     | Tarbase    |
| Neurotrophin signaling pathway (hsa04722)                           | 5.31E-05                  | 76    | 14     | Tarbase    |
| Insulin signaling pathway (hsa04910)                                | 5.32E-05                  | 89    | 15     | Tarbase    |
| ErbB signaling pathway (hsa04012)                                   | 5.90E-05                  | 57    | 15     | Tarbase    |
| Ubiquitin mediated proteolysis (hsa04120)                           | 1.20E-04                  | 83    | 15     | Tarbase    |
| Endocytosis (hsa04144)                                              | 1.48E-04                  | 121   | 15     | Tarbase    |
| Shigellosis (hsa05131)                                              | 2.01E-04                  | 42    | 13     | Tarbase    |
| PI3K-Akt signaling pathway (rno04151)                               | 3.54E-04                  | 178   | 15     | Tarbase    |
| Fatty acid biosynthesis (hsa00061)                                  | 3.55E-04                  | 7     | 10     | Tarbase    |
| Prolactin signaling pathway (rno04917)                              | 4.71E-04                  | 46    | 13     | Tarbase    |

## Supplementary data

S7 Table cont. Biological pathways enriched by differentially expressed microRNAs in Exo\_D21 vs Exo\_D3

| KEGG pathway                                                          | p-value,<br>FDR corrected | genes | miRNAs | algorithms |
|-----------------------------------------------------------------------|---------------------------|-------|--------|------------|
| Estrogen signaling pathway (hsa04915)                                 | 4.71E-04                  | 61    | 14     | Tarbase    |
| Oocyte meiosis (hsa04114)                                             | 4.71E-04                  | 63    | 15     | Tarbase    |
| Acute myeloid leukemia (rno05221)                                     | 7.03E-04                  | 40    | 13     | Tarbase    |
| Thyroid cancer (rno05216)                                             | 8.48E-04                  | 21    | 13     | Tarbase    |
| RNA transport (hsa03013)                                              | 1.44E-03                  | 97    | 15     | Tarbase    |
| Epstein-Barr virus infection (hsa05169)                               | 1.44E-03                  | 118   | 15     | Tarbase    |
| Fatty acid elongation (hsa00062)                                      | 1.90E-03                  | 13    | 8      | Tarbase    |
| Chagas disease (American trypanosomiasis) (hsa05142)                  | 2.38E-03                  | 61    | 14     | Tarbase    |
| Circadian rhythm (hsa04710)                                           | 2.66E-03                  | 22    | 14     | Tarbase    |
| HIF-1 signaling pathway (hsa04066)                                    | 2.96E-03                  | 66    | 15     | Tarbase    |
| Glycosaminoglycan biosynthesis - heparan sulfate / heparin (hsa00534) | 4.20E-03                  | 14    | 9      | Tarbase    |
| MAPK signaling pathway (hsa04010)                                     | 6.21E-03                  | 137   | 14     | Tarbase    |
| Regulation of actin cytoskeleton (hsa04810)                           | 6.36E-03                  | 116   | 15     | Tarbase    |
| Hepatitis C (hsa05160)                                                | 8.87E-03                  | 74    | 13     | Tarbase    |
| AMPK signaling pathway (rno04152)                                     | 8.95E-03                  | 75    | 15     | Tarbase    |
| Apoptosis (hsa04210)                                                  | 9.20E-03                  | 52    | 14     | Tarbase    |
| Fc gamma R-mediated phagocytosis (hsa04666)                           | 1.05E-02                  | 54    | 14     | Tarbase    |
| Steroid biosynthesis (hsa00100)                                       | 1.11E-02                  | 12    | 11     | Tarbase    |
| Axon guidance (hsa04360)                                              | 1.14E-02                  | 68    | 15     | Tarbase    |
| mTOR signaling pathway (rno04150)                                     | 1.29E-02                  | 40    | 15     | Tarbase    |
| Sphingolipid signaling pathway (rno04071)                             | 1.38E-02                  | 66    | 15     | Tarbase    |
| Progesterone-mediated oocyte maturation (hsa04914)                    | 1.80E-02                  | 52    | 14     | Tarbase    |
| Arrhythmogenic right ventricular cardiomyopathy (ARVC) (hsa05412)     | 2.01E-02                  | 36    | 13     | Tarbase    |
| Transcriptional misregulation in cancer (hsa05202)                    | 2.22E-02                  | 98    | 14     | Tarbase    |
| Vitamin B6 metabolism (hsa00750)                                      | 2.27E-02                  | 5     | 5      | Tarbase    |
| Dorso-ventral axis formation (hsa04320)                               | 2.34E-02                  | 19    | 15     | Tarbase    |
| Pathogenic Escherichia coli infection (hsa05130)                      | 2.83E-02                  | 34    | 15     | Tarbase    |
| Salmonella infection (hsa05132)                                       | 2.98E-02                  | 49    | 15     | Tarbase    |
| Herpes simplex infection (hsa05168)                                   | 3.94E-02                  | 104   | 14     | Tarbase    |
| Spliceosome (hsa03040)                                                | 4.72E-02                  | 71    | 14     | Tarbase    |
| Measles (rno05162)                                                    | 4.78E-02                  | 75    | 14     | Tarbase    |
| Toxoplasmosis (hsa05145)                                              | 4.87E-02                  | 65    | 15     | Tarbase    |
